# Supplementary material for: Picks in the Fabric of a Polyploidy Complex: Integrative Species Delimitation in the Tetraploid Leucanthemum Mill. (Compositae, Anthemideae) Representatives
Source: MDPI journal article supplement (doi:10.3390/biology12020288), 2023-02-10

**L. ageratifolium (recent)**

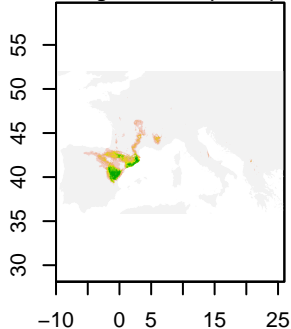

**L. ageratifolium (lgm)**

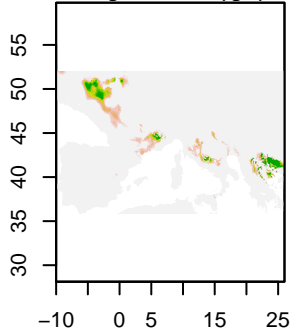

**L. ageratifolium (lig)**

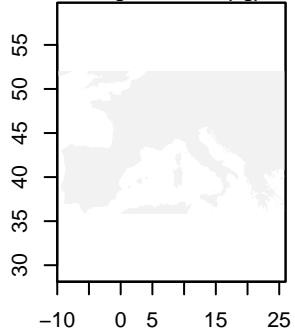

**L. burnatii (recent)**

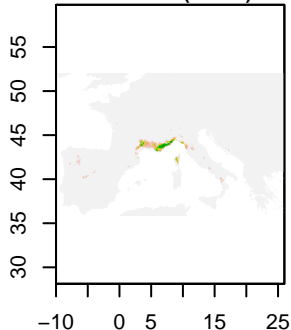

**L. burnatii (lgm)**

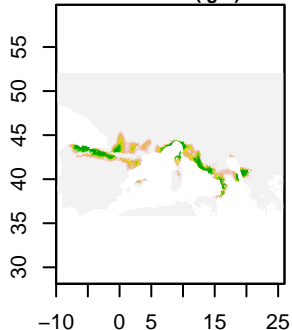

**L. burnatii (lig)**

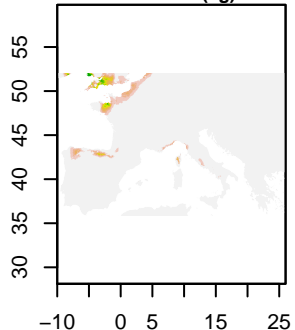

**L. eliasii (recent)**

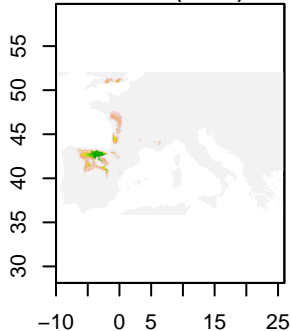

**L. eliasii (lgm)**

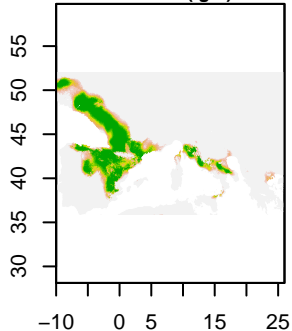

**L. eliasii (lig)**

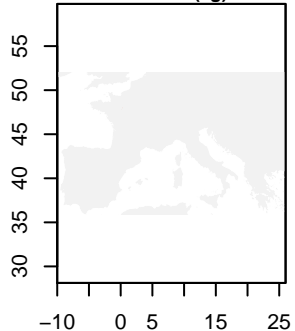

**L. gaudinii (recent)**

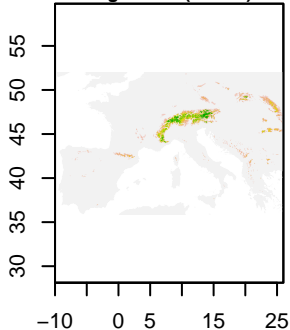

**L. gaudinii (lgm)**

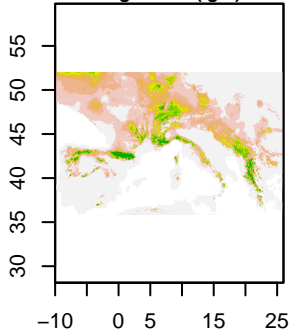

**L. gaudinii (lig)**

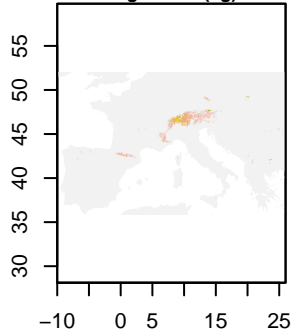

**L. gracilicaule (recent)**

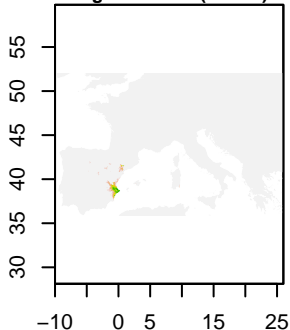

**L. gracilicaule (lgm)**

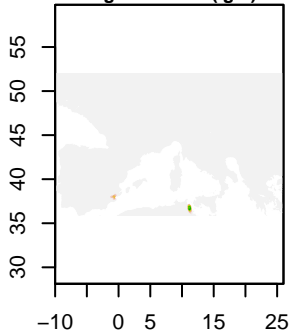

**L. gracilicaule (lig)**

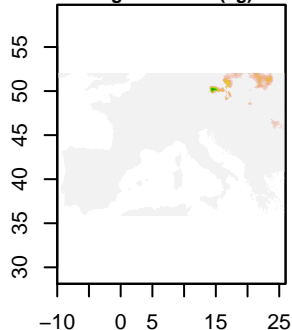

**L. graminifolium (recent)**

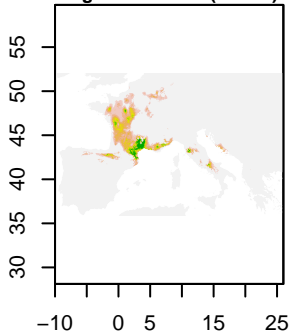

**L. graminifolium (lgm)**

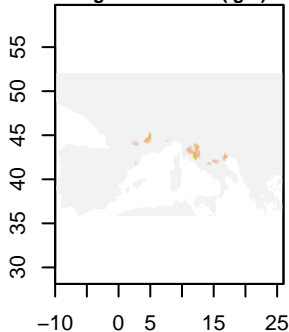

**L. graminifolium (lig)**

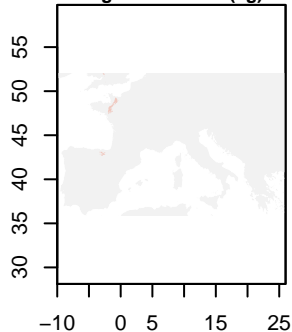

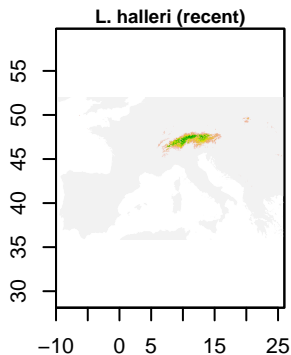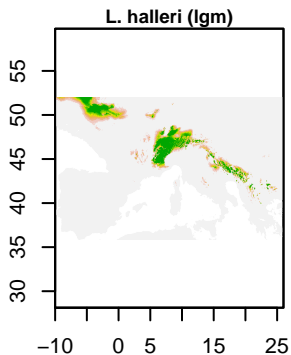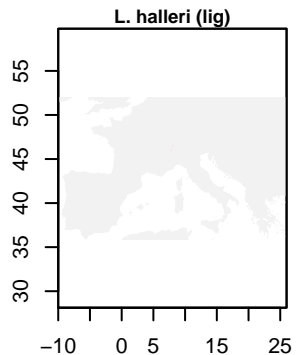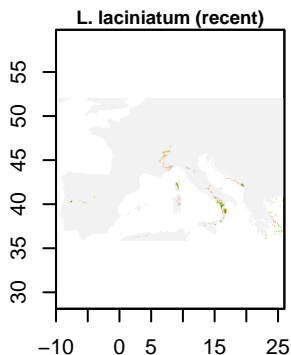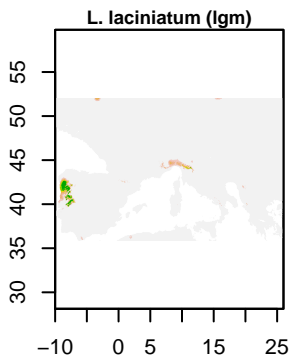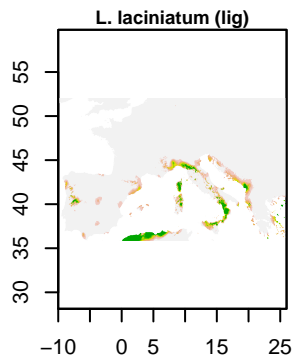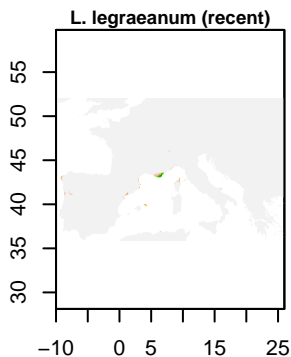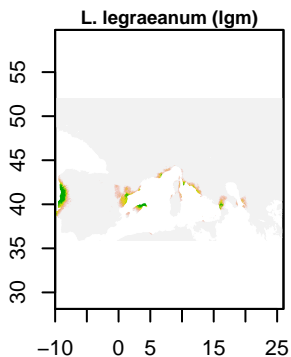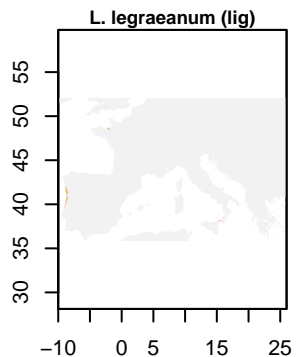

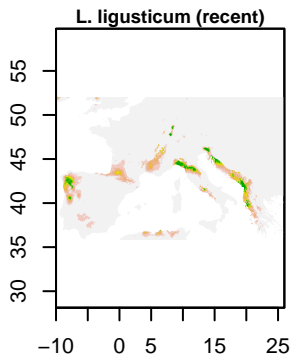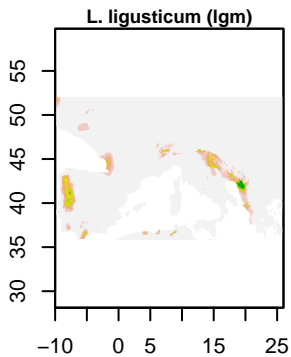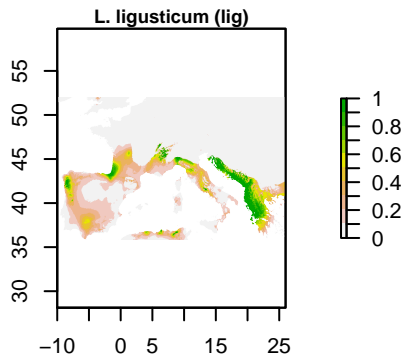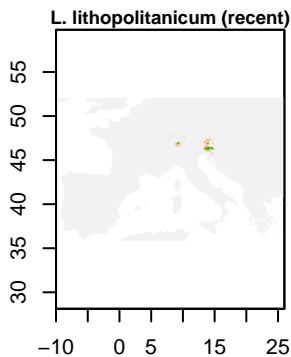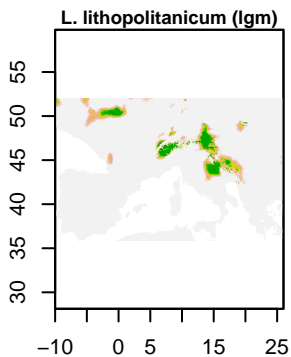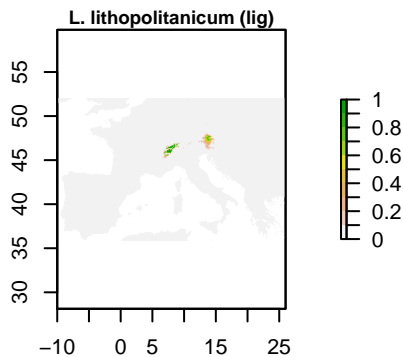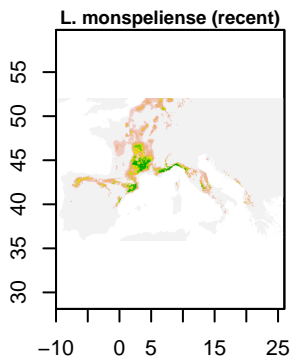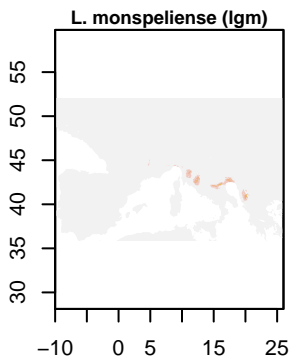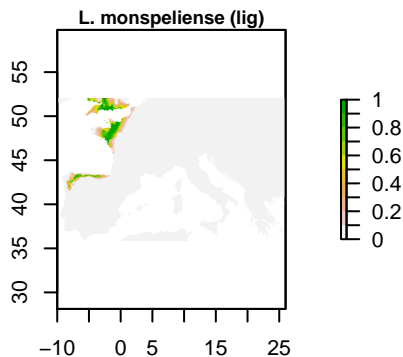

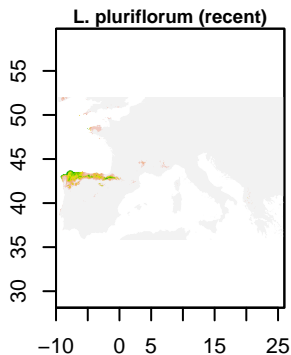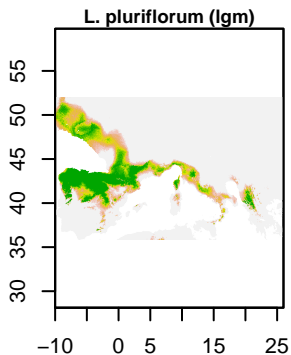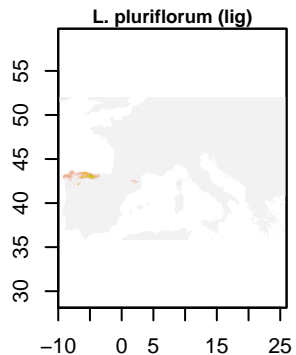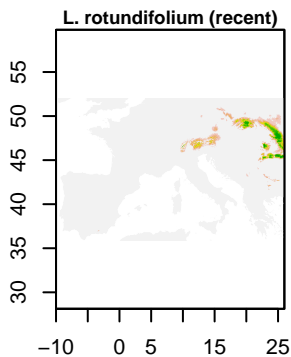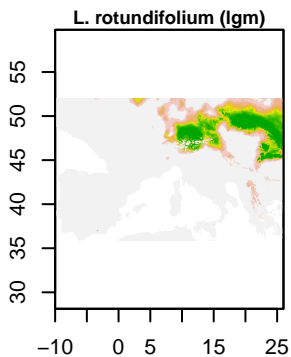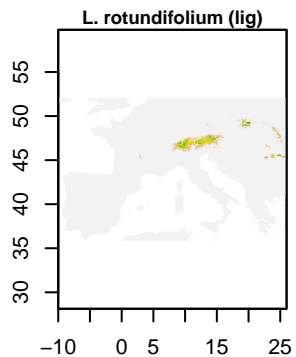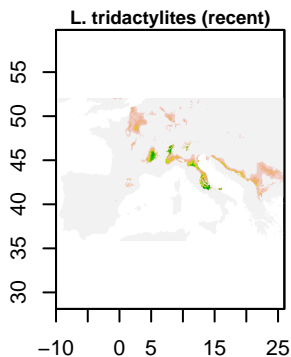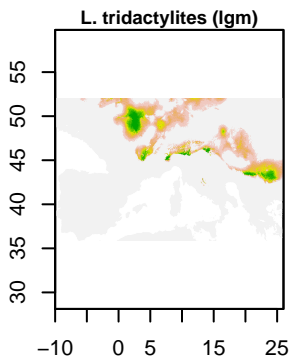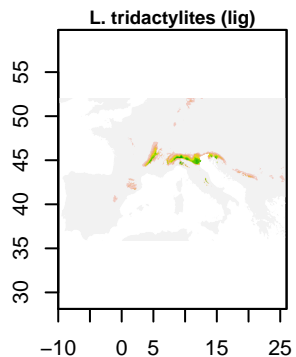

**L. virgatum (recent)**

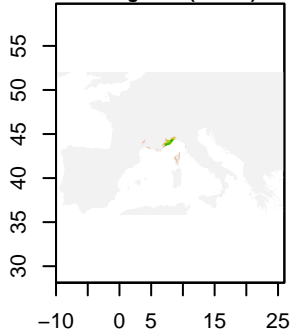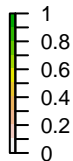

**L. virgatum (lgm)**

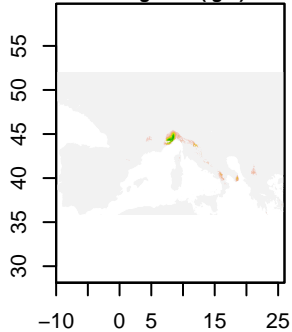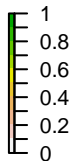

**L. virgatum (lig)**

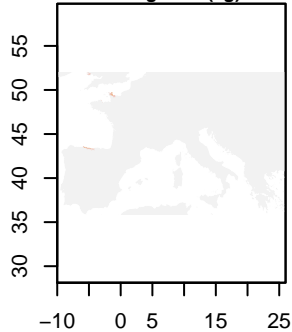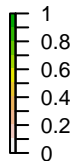

**L. vulgare (recent)**

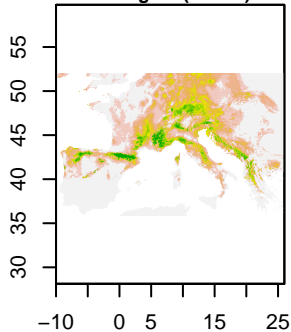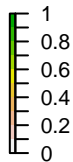

**L. vulgare (lgm)**

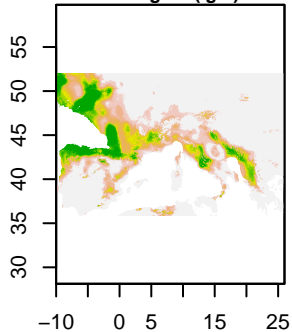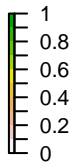

**L. vulgare (lig)**

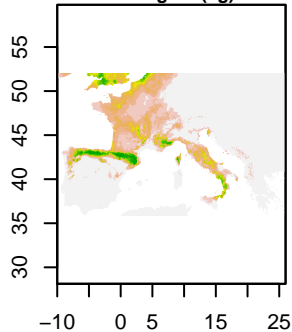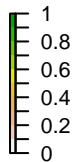

Supplement: s1 [file s1]
