# Supplementary material for: Picks in the Fabric of a Polyploidy Complex: Integrative Species Delimitation in the Tetraploid Leucanthemum Mill. (Compositae, Anthemideae) Representatives
Source: MDPI journal article supplement (doi:10.3390/biology12020288), 2023-02-10
Supplement: s1 [file s1]

**Table ES04.** List of samples used for the ddRAD analysis with information on voucher specimens in the Botanical Museum Berlin (B) and ploidy, collection localities, coordinates, and collectors.

| Sample  | Taxon                                         | Ploidy | Voucher specimens      | Locality                                                                   | Coordinates (latitude, longitude) | Collectors                   |
|---------|-----------------------------------------------|--------|------------------------|----------------------------------------------------------------------------|-----------------------------------|------------------------------|
| 135-05  | <i>L. ageratifolium</i> Pau                   | 2x     | B100386712             | FR, Occitania, Pyrénées-Orientales, La Vallée Heureuse, 410 m              | 42.5038, 2.9603                   | Konowalik KK42 & Ogradowczyk |
| M60-01  | <i>L. ageratifolium</i> Pau                   | 2x     | B100345012, B100345013 | ES, Castile-La Mancha, Cuenca, Salinas de Manzano, 1157 m                  | 40.1019, -1.521                   | Cordel 60                    |
| M60-011 | <i>L. ageratifolium</i> Pau                   | 2x     | B100345012, B100345013 | ES, Castile-La Mancha, Cuenca, Salinas de Manzano, 1157 m                  | 40.1019, -1.521                   | Cordel 60                    |
| 90-01   | <i>L. burnatii</i> Briq. & Cavill.            | 2x     | B100464678             | FR, Provence-Alpes-Côte d'Azur, Alpes-Maritimes, Plateau de Calern, 1235 m | 43.7607, 6.9165                   | Vogt 16615 <i>et al.</i>     |
| 92-02   | <i>L. burnatii</i> Briq. & Cavill.            | 2x     | B100464676, B100464675 | FR, Provence-Alpes-Côte d'Azur, Bouches-du-Rhône, Col des Portes, 650 m    | 43.5450, 5.6626                   | Vogt 16618 <i>et al.</i>     |
| L1008   | <i>L. eliasii</i> (Sennen & Pau) Sennen & Pau | 2x     | B100484003             | ES, Castile and León, Burgos, Rio Ubierna, 880 m                           | 42.5030, -3.7060                  | López 2537 & <i>al.</i>      |
| L1009   | <i>L. eliasii</i> (Sennen & Pau) Sennen & Pau | 2x     | B100484004             | ES, Castile and León, Burgos, San Martín de Ubierna, 920 m                 | 42.5070, -3.7050                  | Galán Cela 576 & Martín      |
| 209-01  | <i>L. gaudinii</i> Dalla Torre                | 2x     | B100386664             | CH, Bern, Interlaken-Oberhaslit, Kleine Scheidegg, 2260 m                  | 46.5781, 7.9700                   | Tomasello TS88               |
| 270-01  | <i>L. gaudinii</i> Dalla Torre                | 2x     | B100413007             | AT, Carinthia, Spittal an der Drau, Torscharte, 2200 m                     | 47.0025, 13.5275                  | Oberprieler 10859            |
| 276-01  | <i>L. gaudinii</i> Dalla Torre                | 2x     | B100413015             | AT, Carinthia, Feldkirchen, Falkert, 2270 m                                | 46.8603, 13.8172                  | Oberprieler 10866            |
| 451-01  | <i>L. gaudinii</i> Dalla Torre                | 2x     | No voucher             | PL, Lesser Poland, Giewont, 1860 m                                         | 49.2505, 19.9343                  | Konowalik 20160909-01        |
| 84-10   | <i>L. gracilicaule</i> (Dufour) Pau           | 2x     | B100386704             | ES, Valencian Community, Alicante, Benirama, 296 m                         | 38.8379, -0.1853                  | Konowalik KK20 & Ogradowczyk |
| 85-04   | <i>L. gracilicaule</i> (Dufour) Pau           | 2x     | B100386702             | ES, Valencian Community, Valencia, Altury, 337 m                           | 39.3135, -0.6810                  | Konowalik KK25 & Ogradowczyk |
| 116-01  | <i>L. graminifolium</i> (L.) Lam.             | 2x     | B100464684, B100464683 | FR, Occitania, Hérault, Col du Perthus, 802 m                              | 43.7761, 3.2386                   | Vogt 16693 & <i>al.</i>      |

| Sample  | Taxon                                           | Ploidy | Voucher specimens                                                      | Locality                                                               | Coordinates (latitude, longitude) | Collectors                 |
|---------|-------------------------------------------------|--------|------------------------------------------------------------------------|------------------------------------------------------------------------|-----------------------------------|----------------------------|
| 96-03   | <i>L. graminifolium</i> (L.) Lam.               | 2x     | B100464663                                                             | FR, Occitania, Aude, Roc de L' Aigle, 560-600 m                        | 43.1494, 2.6294                   | Vogt 16656 & al.           |
| 162-03  | <i>L. halleri</i> (Vitman) Ducommun             | 2x     | B100386798                                                             | DE, Bavaria, Garmisch-Partenkirchen, Meilerhütte, 2345 m               | 47.4134, 11.1277                  | Konowalik KK67 & Tomasello |
| 162-031 | <i>L. halleri</i> (Vitman) Ducommun             | 2x     | B100386798                                                             | DE, Bavaria, Garmisch-Partenkirchen, Meilerhütte, 2345 m               | 47.4134, 11.1277                  | Konowalik KK67 & Tomasello |
| 208-01  | <i>L. halleri</i> (Vitman) Ducommun             | 2x     | B100386672                                                             | FR, Valais, Sion, Col du Sanetsch, 2320 m                              | 46.3308, 7.2911                   | Tomasello TS65             |
| 280-01  | <i>L. laciniatum</i> Huter & al.                | 2x     | B100464203                                                             | IT, Calabria, Cosenza, Col del Dragone, 1580 m                         | 39.9020, 16.1144                  | Tomasello 420              |
| 280-02  | <i>L. laciniatum</i> Huter & al.                | 2x     | B100464203                                                             | IT, Calabria, Cosenza, Col del Dragone, 1580 m                         | 39.9020, 16.1144                  | Tomasello 420              |
| 366-01  | <i>L. legraeae</i> (Rouy) B.Bock & J.-M.Tison   | 2x     | B100486634,<br>B100486635,<br>B100486636,<br>B100486637,<br>B100486638 | FR, Provence-Alpes-Cote d'Azur, Massif des Maures, 410 m               | 43.1986, 6.3151                   | Vogt 17189                 |
| 369-01  | <i>L. legraeae</i> (Rouy) B.Bock & J.-M.Tison   | 2x     | B100486648,<br>B100486649                                              | FR, Provence-Alpes-Cote d'Azur, Massif des Maures, Collabrières, 210 m | 43.2444, 6.3377                   | Vogt 17192                 |
| 384-01  | <i>L. legraeae</i> (Rouy) B.Bock & J.-M.Tison   | 2x     | B100627809,<br>B100627810                                              | FR, Provence-Alpes-Cote d'Azur, Massif des Maures, 410 m               | 43.1988, 6.3151                   | Vogt 17434 & al.           |
| 406-01  | <i>L. ligusticum</i> Marchetti & al.            | 2x     | B100627838,<br>B100627839                                              | IT, Liguria, La Spezia, Rochetta di Vara, 210 m                        | 44.2470, 9.7728                   | Vogt 17460 & al.           |
| 412-01  | <i>L. ligusticum</i> Marchetti & al.            | 2x     | B100627849,<br>B100627850,<br>B100627851                               | IT, Liguria, Genova, Valetti di Varese, 700 m                          | 44.3603, 9.5105                   | Vogt 17468 & al.           |
| 416-01  | <i>L. ligusticum</i> Marchetti & al.            | 2x     | B100627855,<br>B100627856                                              | IT, Liguria, Genova, Piandifieno, 250 m                                | 44.3458, 9.4588                   | Vogt 17471 & al.           |
| 273-02  | <i>L. lithopolitanicum</i> (E.Mayer) Polatschek | 2x     | B100413012                                                             | SL, Central Slovenia, Kaminško Savinjske Alpe, 2100 m                  | 46.3633, 14.5715                  | Oberprieler 10862          |
| 274-02  | <i>L. lithopolitanicum</i> (E.Mayer) Polatschek | 2x     | B100413013                                                             | AT, Carinthia, Völkermarkt, Vellacher Kotschna, 1999 m                 | 46.375, 14.5663                   | Oberprieler 10864          |
| 128-01  | <i>L. monspeliense</i> (L.) H.J.Coste           | 2x     | B100464618                                                             | FR, Occitania, Garde, Mas Méjean, 750 m                                | 44.0888, 3.5786                   | Vogt 16712 & al.           |

| Sample | Taxon                                                                               | Ploidy | Voucher specimens                  | Locality                                           | Coordinates (latitude, longitude) | Collectors                   |
|--------|-------------------------------------------------------------------------------------|--------|------------------------------------|----------------------------------------------------|-----------------------------------|------------------------------|
| 131-02 | <i>L. monspeliense</i> (L.) H.J.Coste                                               | 2x     | B100464615                         | FR, Occitania, Garde, Gardon de St. Jean, 380 m    | 44.1412, 3.7316                   | Vogt 16716 & al.             |
| 340-01 | <i>L. monspeliense</i> (L.) H.J.Coste                                               | 2x     | B100486666, B100486667             | FR, Occitania, Aveyron, Decanzeville, 184 m        | 44.5822, 2.1840                   | Vogt 17156 & al.             |
| 40-09  | <i>L. pluriflorum</i> Pau subsp. <i>pluriflorum</i>                                 | 2x     | B100413758                         | ES, Galicia, Coruña, Cabo Finisterre, 100 m        | 42.8838, -9.2726                  | Högl 40                      |
| 42-04  | <i>L. pluriflorum</i> Pau subsp. <i>pluriflorum</i>                                 | 2x     | No voucher                         | ES, Galicia, Coruña, Caión – Lemaio, 150 m         | 43.3069, -8.6186                  | Högl 42                      |
| 55-01  | <i>L. pluriflorum</i> Pau subsp. <i>pluriflorum</i>                                 | 2x     | B100413749                         | ES, Galicia, Lugo, Cangas, 10 m                    | 43.6309, -7.3330                  | Högl 55                      |
| 60-01  | <i>L. pluriflorum</i> subsp. <i>cantabricum</i> (Font Quer & Guinea) T.Ott & al.    | 2x     | B100413746                         | ES, Galicia, Os Ancares, Piornedo, 1530 m          | 42.8315, -6.8569                  | Högl 60                      |
| 62-01  | <i>L. pluriflorum</i> subsp. <i>cantabricum</i> (Font Quer & Guinea) T.Ott & al.    | 2x     | B100413744                         | ES, Galicia, Lugo, Murias, 750 m                   | 42.9249, -6.8657                  | Högl 62                      |
| 159-11 | <i>L. pluriflorum</i> subsp. <i>gallaecicum</i> (Rodr.Oubiña & S.Ortiz) T.Ott & al. | 2x     | B100386789, B100420775, B100464989 | ES, Galicia, Pontevedra, Basadre, 375 m            | 42.8498, -7.9878                  | Konowalik KK67 & Ogródowczyk |
| 161-03 | <i>L. pluriflorum</i> subsp. <i>gallaecicum</i> (Rodr.Oubiña & S.Ortiz) T.Ott & al. | 2x     | No voucher                         | ES, Galicia, Corunna, Barazon Grande, 380 m        | 42.8533, -7.9994                  | Konowalik s.n. & al.         |
| 446-01 | <i>L. rotundifolium</i> (Willd.) DC.                                                | 2x     | No voucher                         | PL, Podkarpackie, Bieszczady, 920 m                | 49.1191, 22.5776                  | Konowalik 20180622-02-01     |
| 447-01 | <i>L. rotundifolium</i> (Willd.) DC.                                                | 2x     | No voucher                         | RO, Bihor, Bihor, 1230 m                           | 46.5189, 22.6613                  | Konowalik 20180713-03-01     |
| 448-01 | <i>L. rotundifolium</i> (Willd.) DC.                                                | 2x     | No voucher                         | RO, Hunedoara, Râu de Morit, 1140 m                | 45.3159, 22.7705                  | Konowalik 20180807-03-01     |
| 449-01 | <i>L. rotundifolium</i> (Willd.) DC.                                                | 2x     | No voucher                         | BH, Central Bosnia Canton, Vranica Planina, 1860 m | 43.95782, 17.7403                 | Konowalik 20180714-03-01     |

| Sample  | Taxon                                                                                                         | Ploidy | Voucher specimens      | Locality                                                                                | Coordinates (latitude, longitude) | Collectors               |
|---------|---------------------------------------------------------------------------------------------------------------|--------|------------------------|-----------------------------------------------------------------------------------------|-----------------------------------|--------------------------|
| 450-01  | <i>L. rotundifolium</i> (Willd.) DC.                                                                          | 2x     | No voucher             | PL, Lesser Poland Voivodeship, Sucha County, Babia Góra, 1100 m                         | 49.5879, 19.5515                  | Konowalik 20170920-01    |
| 278-01  | <i>L. tridactylites</i> (A.Kern. & Huter) Huter & al.                                                         | 2x     | B100464207             | IT, Abruzzo, Pescara, Majella, Blockhaus, 2080 m                                        | 42.1384, 14.1101                  | Tomasello 417            |
| 278-05  | <i>L. tridactylites</i> (A.Kern. & Huter) Huter & al.                                                         | 2x     | B100464207             | IT, Abruzzo, Pescara, Majella, Blockhaus, 2080 m                                        | 42.1384, 14.1101                  | Tomasello 417            |
| 225-02  | <i>L. virgatum</i> (Desr.) Clos                                                                               | 2x     | B100411746             | FR, Provence-Alpes-Côte d'Azur, Alpes-Maritimes, Lantosque – St.-Jean-la-Rivière, 430 m | 43.9538, 7.2961                   | Vogt 16892 & Oberprieler |
| 250-01  | <i>L. virgatum</i> (Desr.) Clos                                                                               | 2x     | B100350169, B100350172 | IT, Liguria, Savona, Ranzo – Ortovero, 215 m                                            | 44.0596, 8.0583                   | Vogt 16932 & Oberprieler |
| 184-01  | <i>L. vulgare</i> Lam. subsp. <i>vulgare</i>                                                                  | 2x     | B100346626             | BH, Gacko, Nevesinje, Ribari – Rilja, 930 m                                             | 43.2403, 18.3364                  | Vogt 16806 & Prem-Vogt   |
| 58-02   | <i>L. vulgare</i> Lam. subsp. <i>vulgare</i>                                                                  | 2x     | B100413748             | ES, Galicia, Lugo, Santa Mariña – Reboredo, 490 m                                       | 42.8205, -7.9504                  | Höfl 58                  |
| 94-01   | <i>L. vulgare</i> Lam. subsp. <i>vulgare</i>                                                                  | 2x     | B100464674             | FR, Occitania, Aude, Carcassone, Montlaur, 160 m                                        | 43.1294, 2.6073                   | Vogt 16641 & al.         |
| L046-07 | <i>L. vulgare</i> Lam. subsp. <i>vulgare</i>                                                                  | 2x     | B100550249             | DE, Bavaria, Regensburg, Deuerling, 450 m                                               | 49.0333, 11.8833                  | Eder & Oberprieler s.n.  |
| M02-01  | <i>L. vulgare</i> subsp. <i>barrelieri</i> (Dufour ex DC.) O.Bolós & Vigo (= <i>L. pyrenaicum</i> Vogt & al.) | 2x     | B100297950             | ES, Aragón, Huesca, San Juan de la Peña, 755 m                                          | 42.5250, -0.6690                  | Cordel 2                 |
| 266-01  | <i>L. vulgare</i> subsp. <i>barrelieri</i> (Dufour ex DC.) O.Bolós & Vigo (= <i>L. pyrenaicum</i> Vogt & al.) | 2x     | B100464208             | ES, Aragon, Huesca, Balneario de Panticosa, 1650 m                                      | 42.7806, -0.2467                  | Tomasello TS382          |
| 266-02  | <i>L. vulgare</i> subsp. <i>barrelieri</i> (Dufour ex DC.) O.Bolós & Vigo (= <i>L. pyrenaicum</i> Vogt & al.) | 2x     | B100464208             | ES, Aragon, Huesca, Balneario de Panticosa, 1650 m                                      | 42.7806, -0.2467                  | Tomasello TS382          |
| 267-03  | <i>L. vulgare</i> subsp. <i>barrelieri</i> (Dufour ex DC.) O.Bolós & Vigo (= <i>L. pyrenaicum</i> Vogt & al.) | 2x     | B100464210             | ES, Aragon, Huesca, Angel Orus el Forcau, 2000 m                                        | 42.6327, 0.4530                   | Tomasello TS392          |
|         |                                                                                                               |        |                        |                                                                                         |                                   |                          |
| 45-01   | <i>L. cantabricum</i> Sennen                                                                                  | 4x     | B100413756             | ES, Galicia, O Eume, Portocobo – Aurela, 350 m                                          | 43.3972, -8.0959                  | Höfl 45                  |

| Sample | Taxon                                                                           | Ploidy | Voucher specimens                              | Locality                                                                  | Coordinates (latitude, longitude) | Collectors                   |
|--------|---------------------------------------------------------------------------------|--------|------------------------------------------------|---------------------------------------------------------------------------|-----------------------------------|------------------------------|
| 50-01  | <i>L. cantabricum</i> Sennen                                                    | 4x     | B100413752                                     | ES, Galicia, Ortegal, Viñan – Serantes, 10 m                              | 43.6749, -7.9022                  | Höfl 50                      |
| 50-02  | <i>L. cantabricum</i> Sennen                                                    | 4x     | B100413752                                     | ES, Galicia, Ortegal, Viñan – Serantes, 10 m                              | 43.6749, -7.9022                  | Höfl 50                      |
| 50-03  | <i>L. cantabricum</i> Sennen                                                    | 4x     | B100413752                                     | ES, Galicia, Ortegal, Viñan – Serantes, 10 m                              | 43.6749, -7.9022                  | Höfl 50                      |
| 66-01  | <i>L. crassifolium</i> (Lange) Lange                                            | 4x     | B100413740                                     | ES, Asturias, Luanco, Cabo de Peñas, 60 m                                 | 43.6565, -5.8510                  | Höfl 66 & Himmelreich        |
| 66-02  | <i>L. crassifolium</i> (Lange) Lange                                            | 4x     | B100413740                                     | ES, Asturias, Luanco, Cabo de Peñas, 60 m                                 | 43.6565, -5.8510                  | Höfl 66 & Himmelreich        |
| 69-01  | <i>L. crassifolium</i> (Lange) Lange                                            | 4x     | B100413737                                     | ES, Cantabria, San Vicente de la Barquera, 50 m                           | 43.3943, -4.3571                  | Höfl 69 & Himmelreich        |
| 69-02  | <i>L. crassifolium</i> (Lange) Lange                                            | 4x     | B100413737                                     | ES, Cantabria, San Vicente de la Barquera, 50 m                           | 43.3943, -4.3571                  | Höfl 69 & Himmelreich        |
| 424-01 | <i>L. delarbrei</i> Timb.-Lagr. subsp. <i>delarbrei</i>                         | 4x     | B100605498, B100605497, B100605489             | FR, Auvergne-Rhone-Alpes, Cantal, l'Arpon du Diable, 1688 m               | 45.0569, 2.7461                   | Vogt 17487 & Prem-Vogt       |
| 425-01 | <i>L. delarbrei</i> Timb.-Lagr. subsp. <i>delarbrei</i>                         | 4x     | B100605488, B100605487, B100605486, B100605501 | FR, Auvergne-Rhône-Alpes, Cantal, Col d'Eylac – Brèche de Rolland, 1553 m | 45.1050, 2.6847                   | Vogt 17489 & Prem-Vogt       |
| 427-01 | <i>L. delarbrei</i> Timb.-Lagr. subsp. <i>delarbrei</i>                         | 4x     | B100605494                                     | FR, Auvergne-Rhone-Alpes, Puy-de-Dôme, Puy de Sancy, 1818 m               | 45.5286, 2.8128                   | Vogt 17494 & Prem-Vogt       |
| 428-01 | <i>L. delarbrei</i> Timb.-Lagr. subsp. <i>delarbrei</i>                         | 4x     | B100605492, B100603419                         | FR, Auvergne-Rhone-Alpes, Puy-de-Dôme, Puy de Sancy, 1457 m               | 45.5364, 2.8125                   | Vogt 17495 & Prem-Vogt       |
| 101-01 | <i>L. delarbrei</i> subsp. <i>ruscinonense</i> (Jean. & Timb.-Lagr.) Vogt & al. | 4x     | B100464658, B100464657                         | FR, Occitania, Aude, Conques-sur-Orbiel – Lastours, 193 m                 | 43.3279, 2.3835                   | Vogt 16670 & al.             |
| 110-01 | <i>L. delarbrei</i> subsp. <i>ruscinonense</i> (Jean. & Timb.-Lagr.) Vogt & al. | 4x     | B100464637                                     | FR, Occitania, Hérault, Olargues – Bédarieux, 214 m                       | 43.5786, 3.0212                   | Vogt 16685 & al.             |
| 139-01 | <i>L. delarbrei</i> subsp. <i>ruscinonense</i> (Jean. & Timb.-Lagr.) Vogt & al. | 4x     | B100386786                                     | ES, Catalonia, Girona, Maçanet de Cabrenys, 1015 m                        | 42.412, 2.7504                    | Konowalik KK46 & Ogradowczyk |
| 349-01 | <i>L. delarbrei</i> subsp. <i>ruscinonense</i> (Jean. & Timb.-Lagr.) Vogt & al. | 4x     | B100486690, B100486691, B100486692, B100486693 | FR, Occitania, Tarn, Brassac, Rochers de Sarrasy, 502 m                   | 43.6236, 2.4984                   | Vogt 17171 & al.             |

| Sample   | Taxon                                                                           | Ploidy | Voucher specimens      | Locality                                               | Coordinates (latitude, longitude) | Collectors                            |
|----------|---------------------------------------------------------------------------------|--------|------------------------|--------------------------------------------------------|-----------------------------------|---------------------------------------|
| 355-03   | <i>L. delarbrei</i> subsp. <i>ruscinonense</i> (Jean. & Timb.-Lagr.) Vogt & al. | 4x     | B100486699, B100486700 | FR, Occitania, Hérault, Lodève, Roure de Millau, 182 m | 43.7384, 3.3283                   | Vogt 17177 & al.                      |
| 106-01   | <i>L. ircutianum</i> DC. subsp. <i>ircutianum</i>                               | 4x     | B100464641             | FR, Occitania, Tarn, Mazamet, 410 m                    | 43.4816, 2.3717                   | Vogt 16678 & al.                      |
| 177-01   | <i>L. ircutianum</i> DC. subsp. <i>ircutianum</i>                               | 4x     | B100346630             | ME, Cetinje, Lovćen, Bieloši, 920 m                    | 42.3681, 18.8903                  | Vogt 16794 & Prem-Vogt                |
| 343-01   | <i>L. ircutianum</i> DC. subsp. <i>ircutianum</i>                               | 4x     | B100486672, B100486673 | FR, Occitania, Aveyron, Decanzeville, Firmi, 470 m     | 44.5589, 2.3114                   | Vogt 17159 & al.                      |
| 437-01   | <i>L. ircutianum</i> DC. subsp. <i>ircutianum</i>                               | 4x     | B101003356             | FR, Corsica, Corse-du-Sud, Ghisoni – Cozzano, 920 m    | 41.9727, 9.1843                   | Vogt 17865 & al.                      |
| 87-01    | <i>L. ircutianum</i> DC. subsp. <i>ircutianum</i>                               | 4x     | B100464680             | IT, Piedmont, Cuneo, Roccavione, 670 m                 | 44.2982, 7.5052                   | Vogt 16611 & al.                      |
| L052-02  | <i>L. ircutianum</i> DC. subsp. <i>ircutianum</i>                               | 4x     | No voucher             | DE, Bavaria, Regensburg, 385 m                         | 48.9833, 12.0833                  | Eder s.n.                             |
| L055-03  | <i>L. ircutianum</i> DC. subsp. <i>ircutianum</i>                               | 4x     | B100627297             | DE, Bavaria, Garmisch-Partenkirchen, Laber, 1430 m     | 47.5833, 11.1167                  | Eder & Oberprieler 10298              |
| L055-031 | <i>L. ircutianum</i> DC. subsp. <i>ircutianum</i>                               | 4x     | B100627297             | DE, Bavaria, Garmisch-Partenkirchen, Laber, 1430 m     | 47.5833, 11.1167                  | Eder & Oberprieler 10298              |
| L062-04  | <i>L. ircutianum</i> DC. subsp. <i>ircutianum</i>                               | 4x     | B100416530, B100627403 | AT, Vorarlberg, Kleinwalsertal, Baad, 1380 m           | 47.3000, 10.1000                  | Eder, Oberprieler 10304a & Vogt 16222 |
| 170-02   | <i>L. ircutianum</i> subsp. <i>leucolepis</i> (Briq. & Cavill.) Vogt & Greuter  | 4x     | B100346645             | ME, Herceg Novi, Sutorina, 34 m                        | 42.4742, 18.4731                  | Vogt 16724 & Prem-Vogt                |
| 170-021  | <i>L. ircutianum</i> subsp. <i>leucolepis</i> (Briq. & Cavill.) Vogt & Greuter  | 4x     | B100346645             | ME, Herceg Novi, Sutorina, 34 m                        | 42.4742, 18.4731                  | Vogt 16724 & Prem-Vogt                |
| 174-01   | <i>L. ircutianum</i> subsp. <i>leucolepis</i> (Briq. & Cavill.) Vogt & Greuter  | 4x     | B100346612, B100346613 | ME, Cetinje, Lovćen, Njeguši, 900 m                    | 42.4389, 18.8319                  | Vogt 16790 & Prem-Vogt                |
| 329-02   | <i>L. ircutianum</i> subsp. <i>leucolepis</i> (Briq. & Cavill.) Vogt & Greuter  | 4x     | B100464093, B100464094 | IT, Abruzzo, Pescara, Piano d'Orta, 125 m              | 42.2447, 13.9659                  | Oberprieler 10870                     |

| Sample | Taxon                                                                          | Ploidy | Voucher specimens      | Locality                                           | Coordinates (latitude, longitude) | Collectors               |
|--------|--------------------------------------------------------------------------------|--------|------------------------|----------------------------------------------------|-----------------------------------|--------------------------|
| 371-01 | <i>L. ircutianum</i> subsp. <i>leucolepis</i> (Briq. & Cavill.) Vogt & Greuter | 4x     | B100486717             | HR, Primorje-Gorski Kotar, Vela Učka, 770 m        | 45.2772, 14.1944                  | Vogt 17198 & Prem-Vogt   |
| 323-03 | <i>L. meridionale</i> Legrand                                                  | 4x     | B100464096, B100458572 | FR, Occitania, Aveyron, Decanzeville, Firmi, 388 m | 44.5514, 2.3044                   | Oberprieler 10867        |
| 323-04 | <i>L. meridionale</i> Legrand                                                  | 4x     | B100464096, B100458572 | FR, Occitania, Aveyron, Decanzeville, Firmi, 388 m | 44.5514, 2.3044                   | Oberprieler 10867        |
| 323-05 | <i>L. meridionale</i> Legrand                                                  | 4x     | B100464096, B100458572 | FR, Occitania, Aveyron, Decanzeville, Firmi, 388 m | 44.5514, 2.3044                   | Oberprieler 10867        |
| 7-02   | <i>L. pseudosylvaticum</i> (Vogt) Vogt & Oberpr.                               | 4x     | B100413784             | PT, Bragança, Izeda – Santulhão, 350 m             | 41.5582, -6.6754                  | Höfl 7 & Hutschenreuther |
| 1-05   | <i>L. pseudosylvaticum</i> (Vogt) Vogt & Oberpr.                               | 4x     | B100413790             | ES, Galicia, Lugo, Pedrafita, 1100 m               | 42.7267, -7.0258                  | Höfl 1 & Hutschenreuther |
| 3-08   | <i>L. pseudosylvaticum</i> (Vogt) Vogt & Oberpr.                               | 4x     | B100413788             | ES, Galicia, Ourense, Rubiá – O Real, 470 m        | 42.4634, -6.8950                  | Höfl 3 & Hutschenreuther |
