# Supplementary material for: Picks in the Fabric of a Polyploidy Complex: Integrative Species Delimitation in the Tetraploid Leucanthemum Mill. (Compositae, Anthemideae) Representatives
Source: MDPI journal article supplement (doi:10.3390/biology12020288), 2023-02-10

Pattern 1: blue  
Pattern 2: orange  
Pattern 3/4: green  
Pattern 5: red

L. pseudosylvaticum

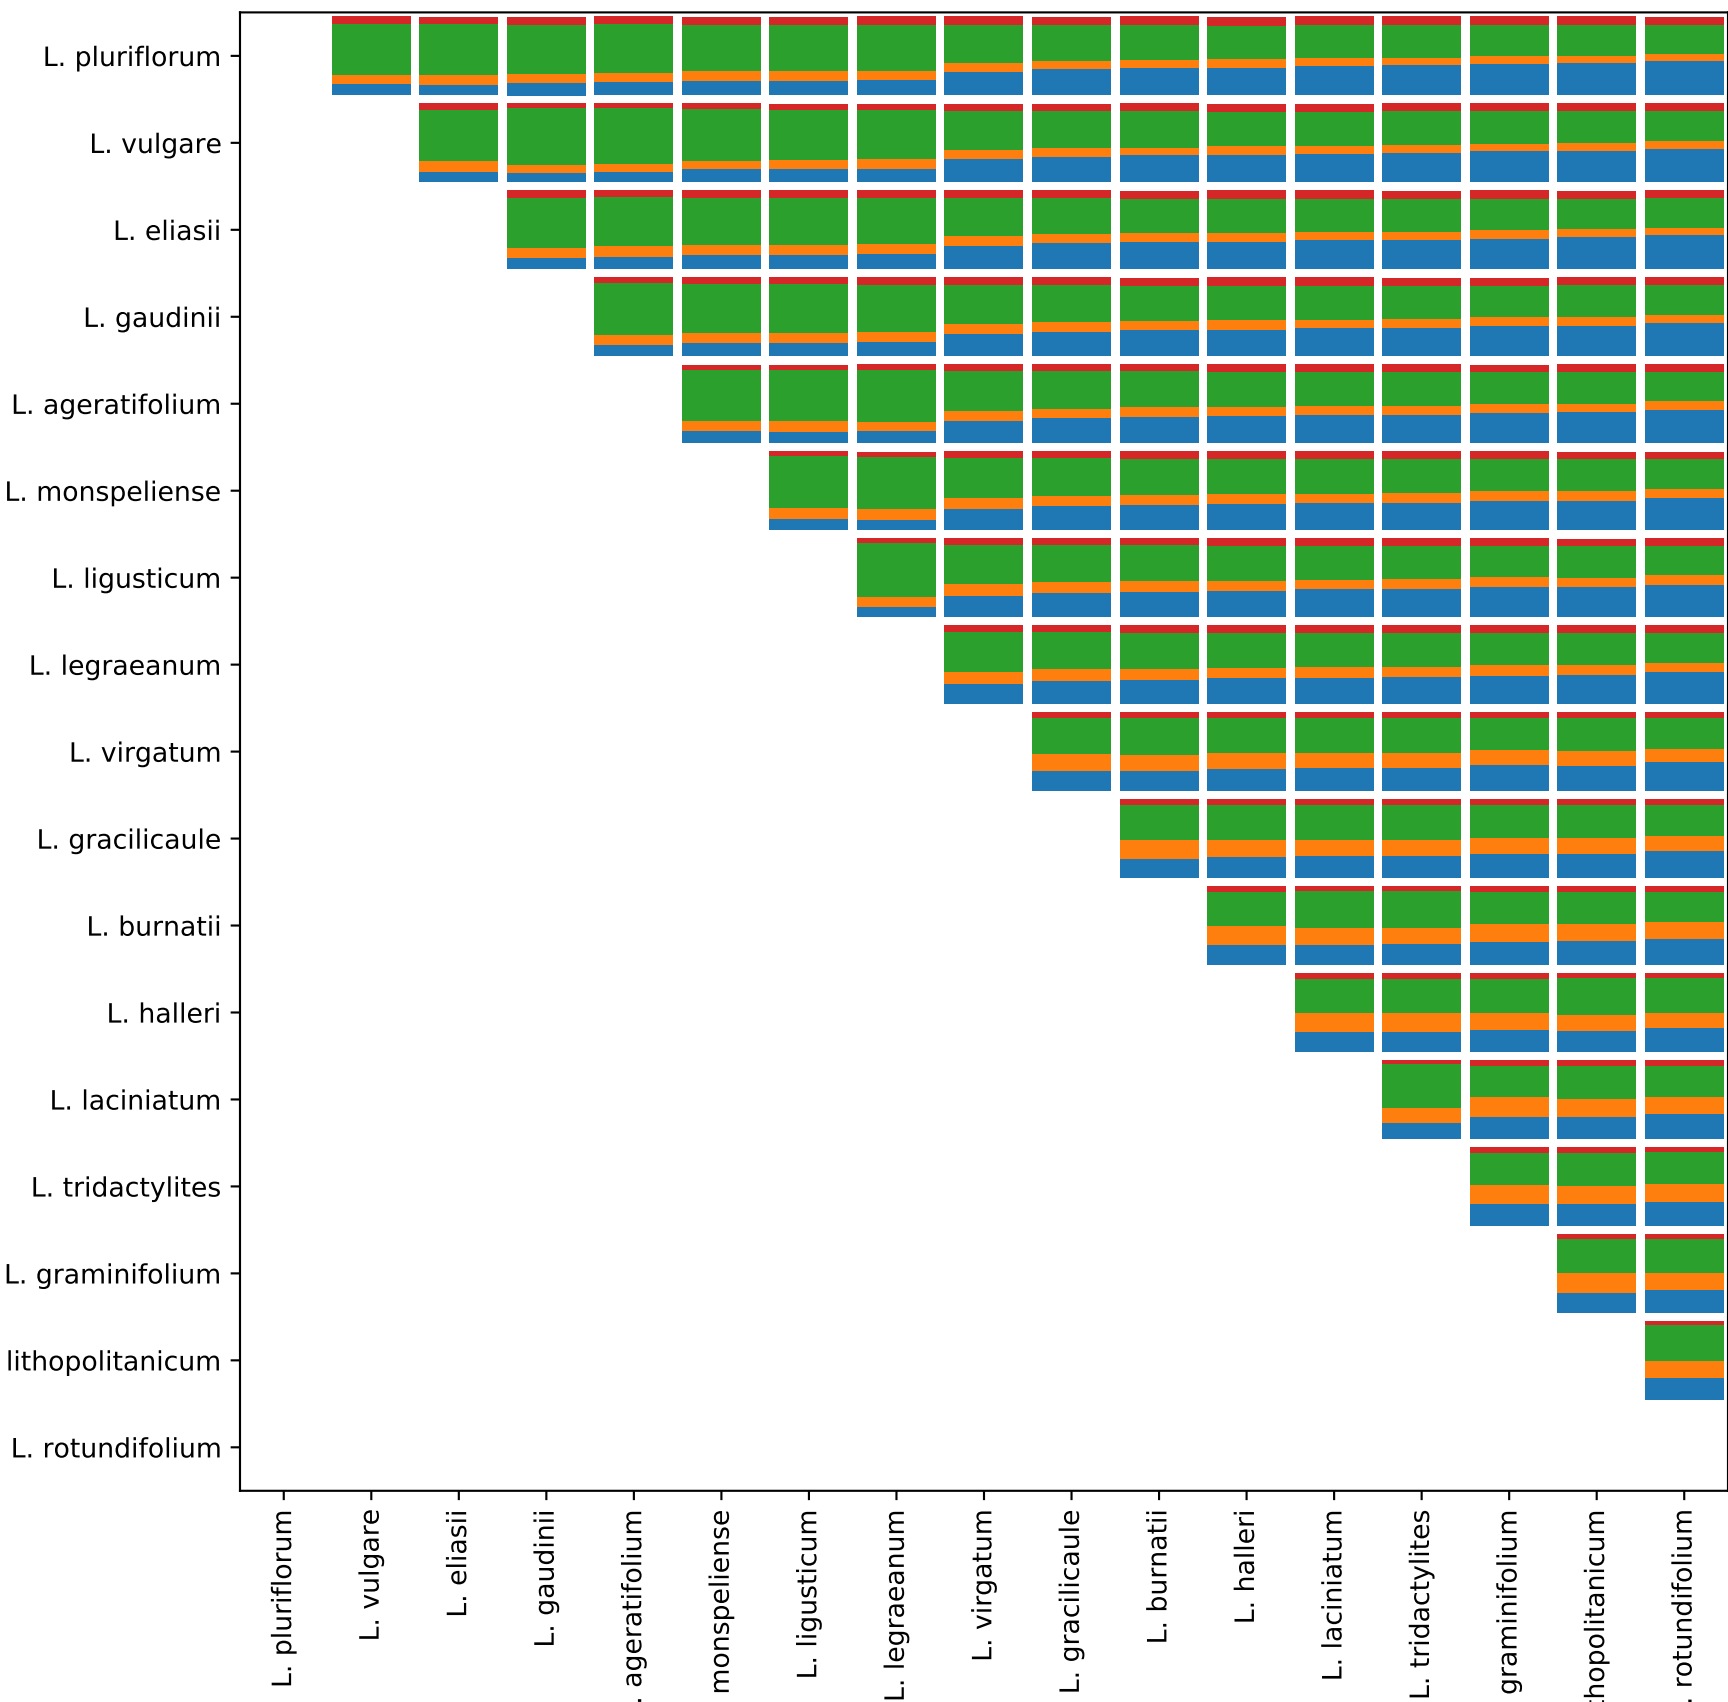

Pattern 5: red

L. delarbrei subsp. ruscinonense

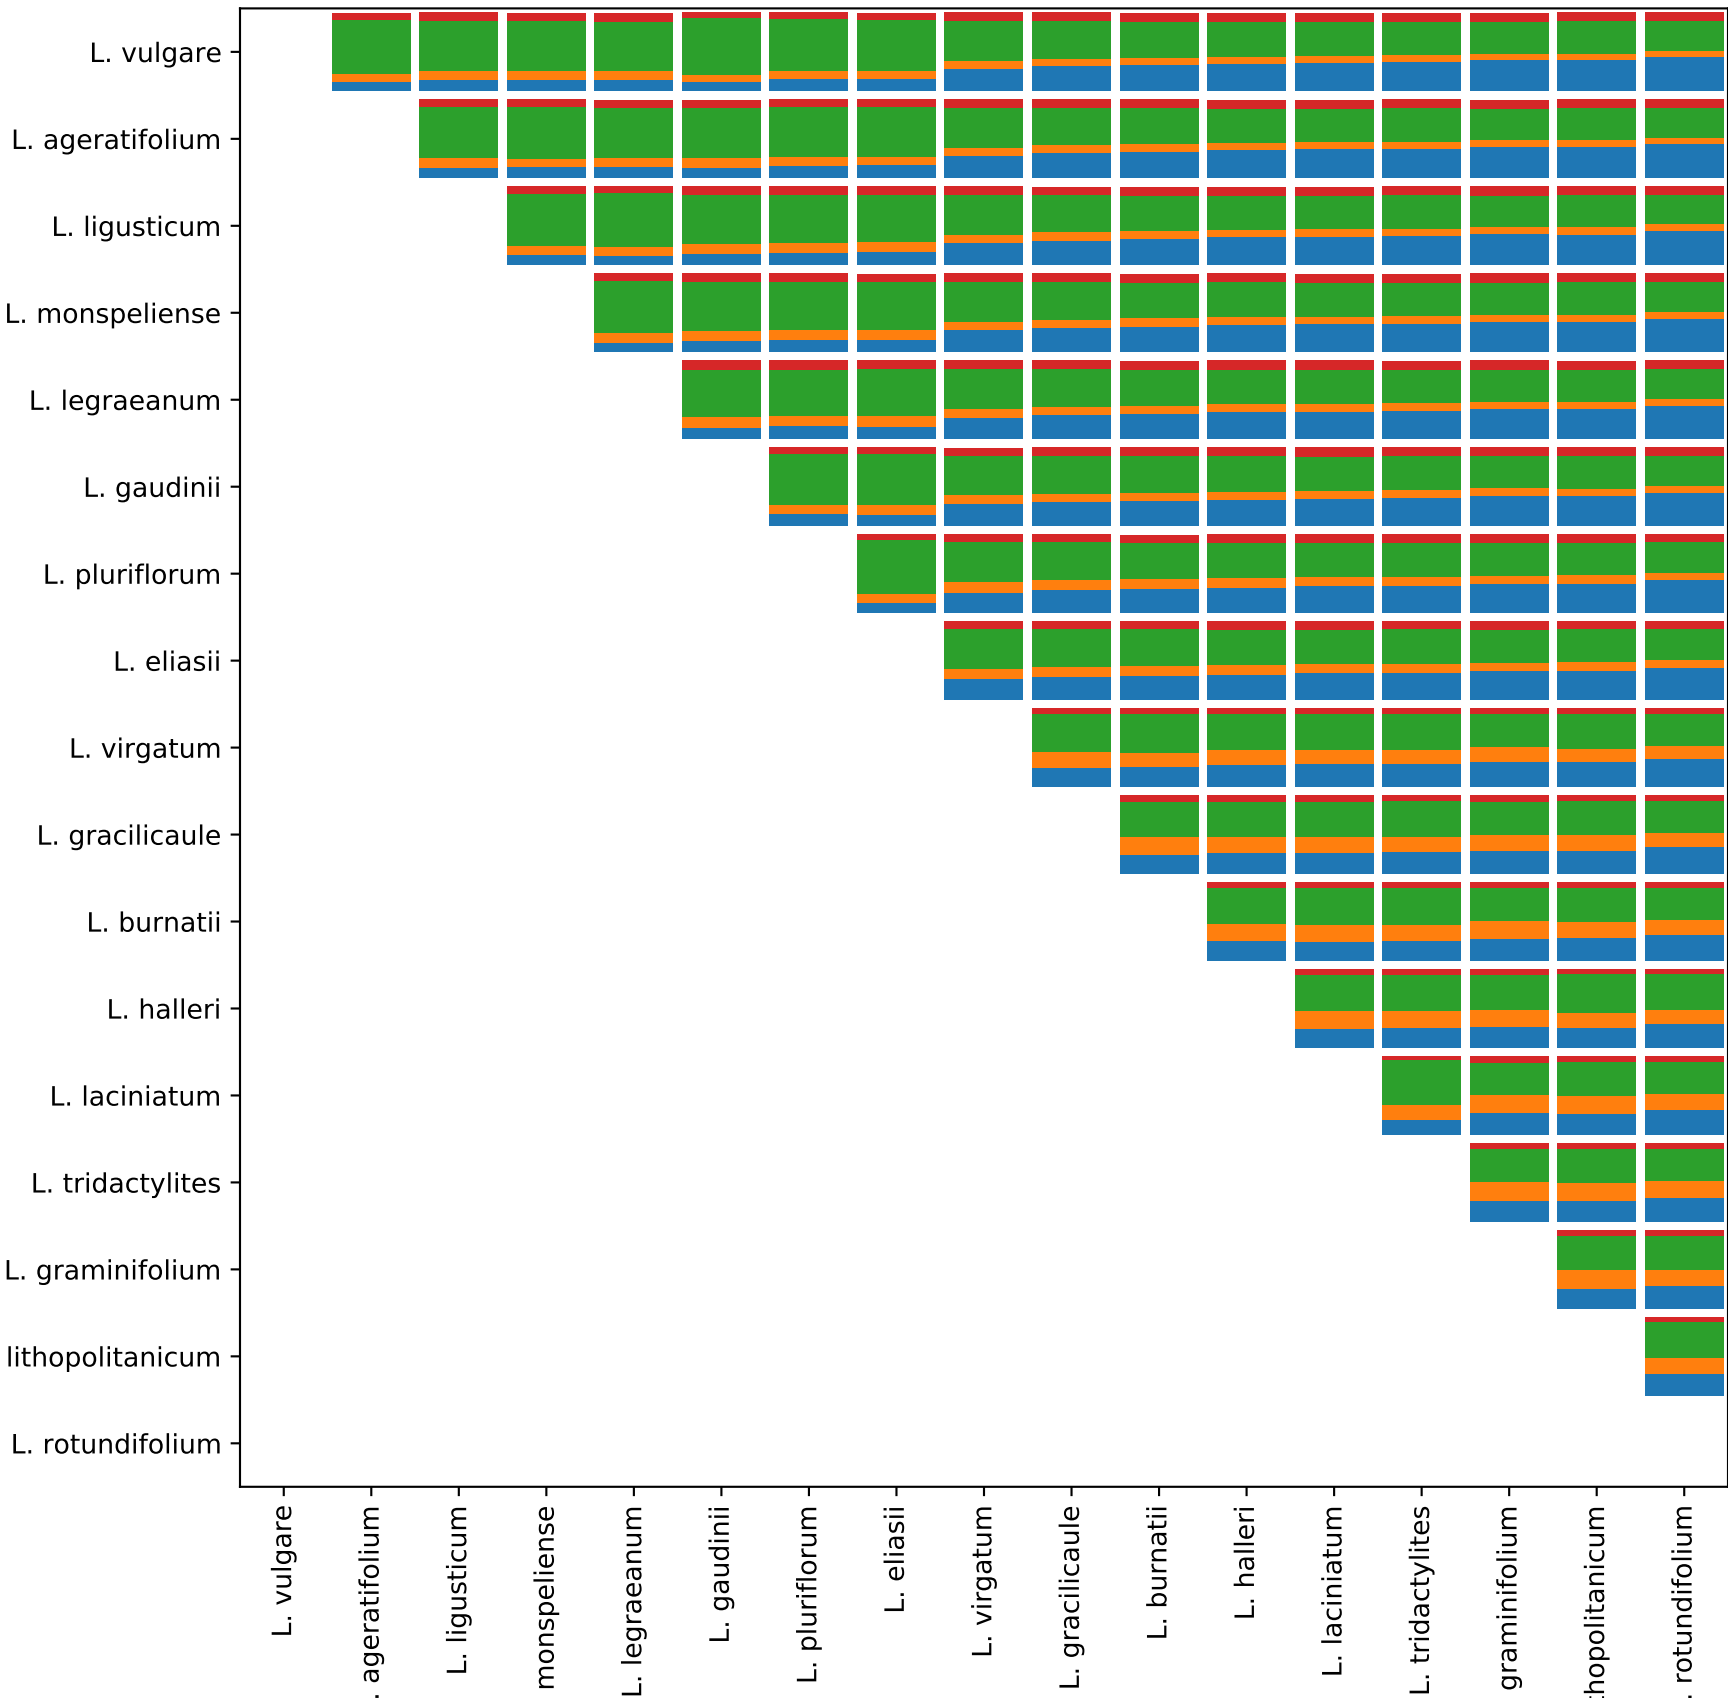

Pattern 1: blue  
Pattern 2: orange  
Pattern 3/4: green  
Pattern 5: red

# L. ircutianum subsp. ircutianum

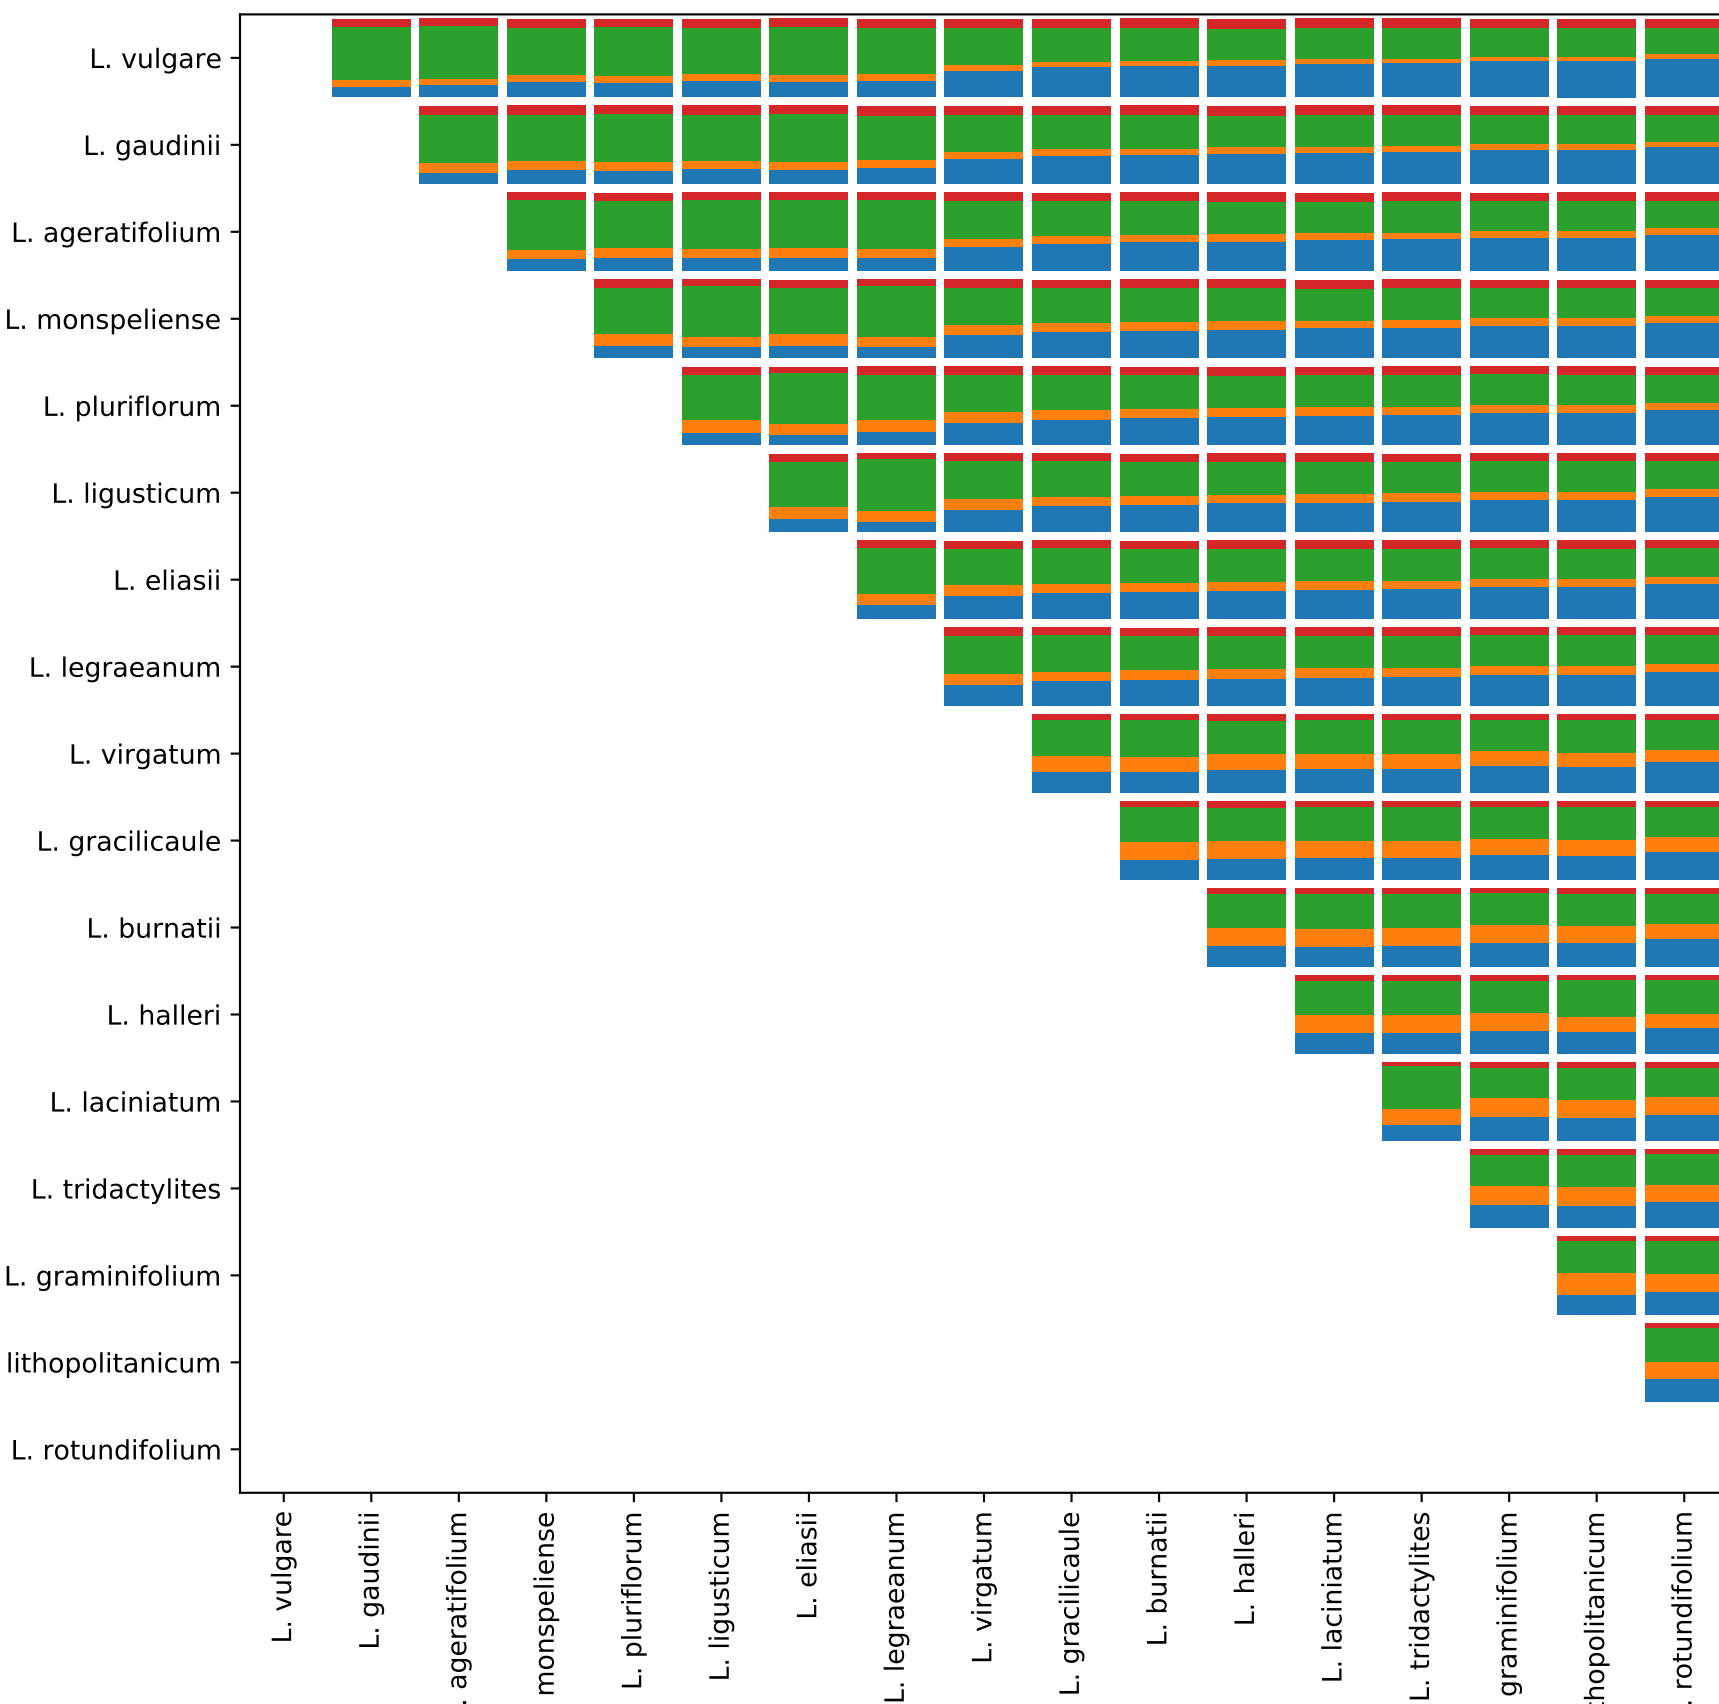

Pattern 1: blue  
Pattern 2: orange  
Pattern 3/4: green  
Pattern 5: red

# L. ircutianum subsp. leucolepis

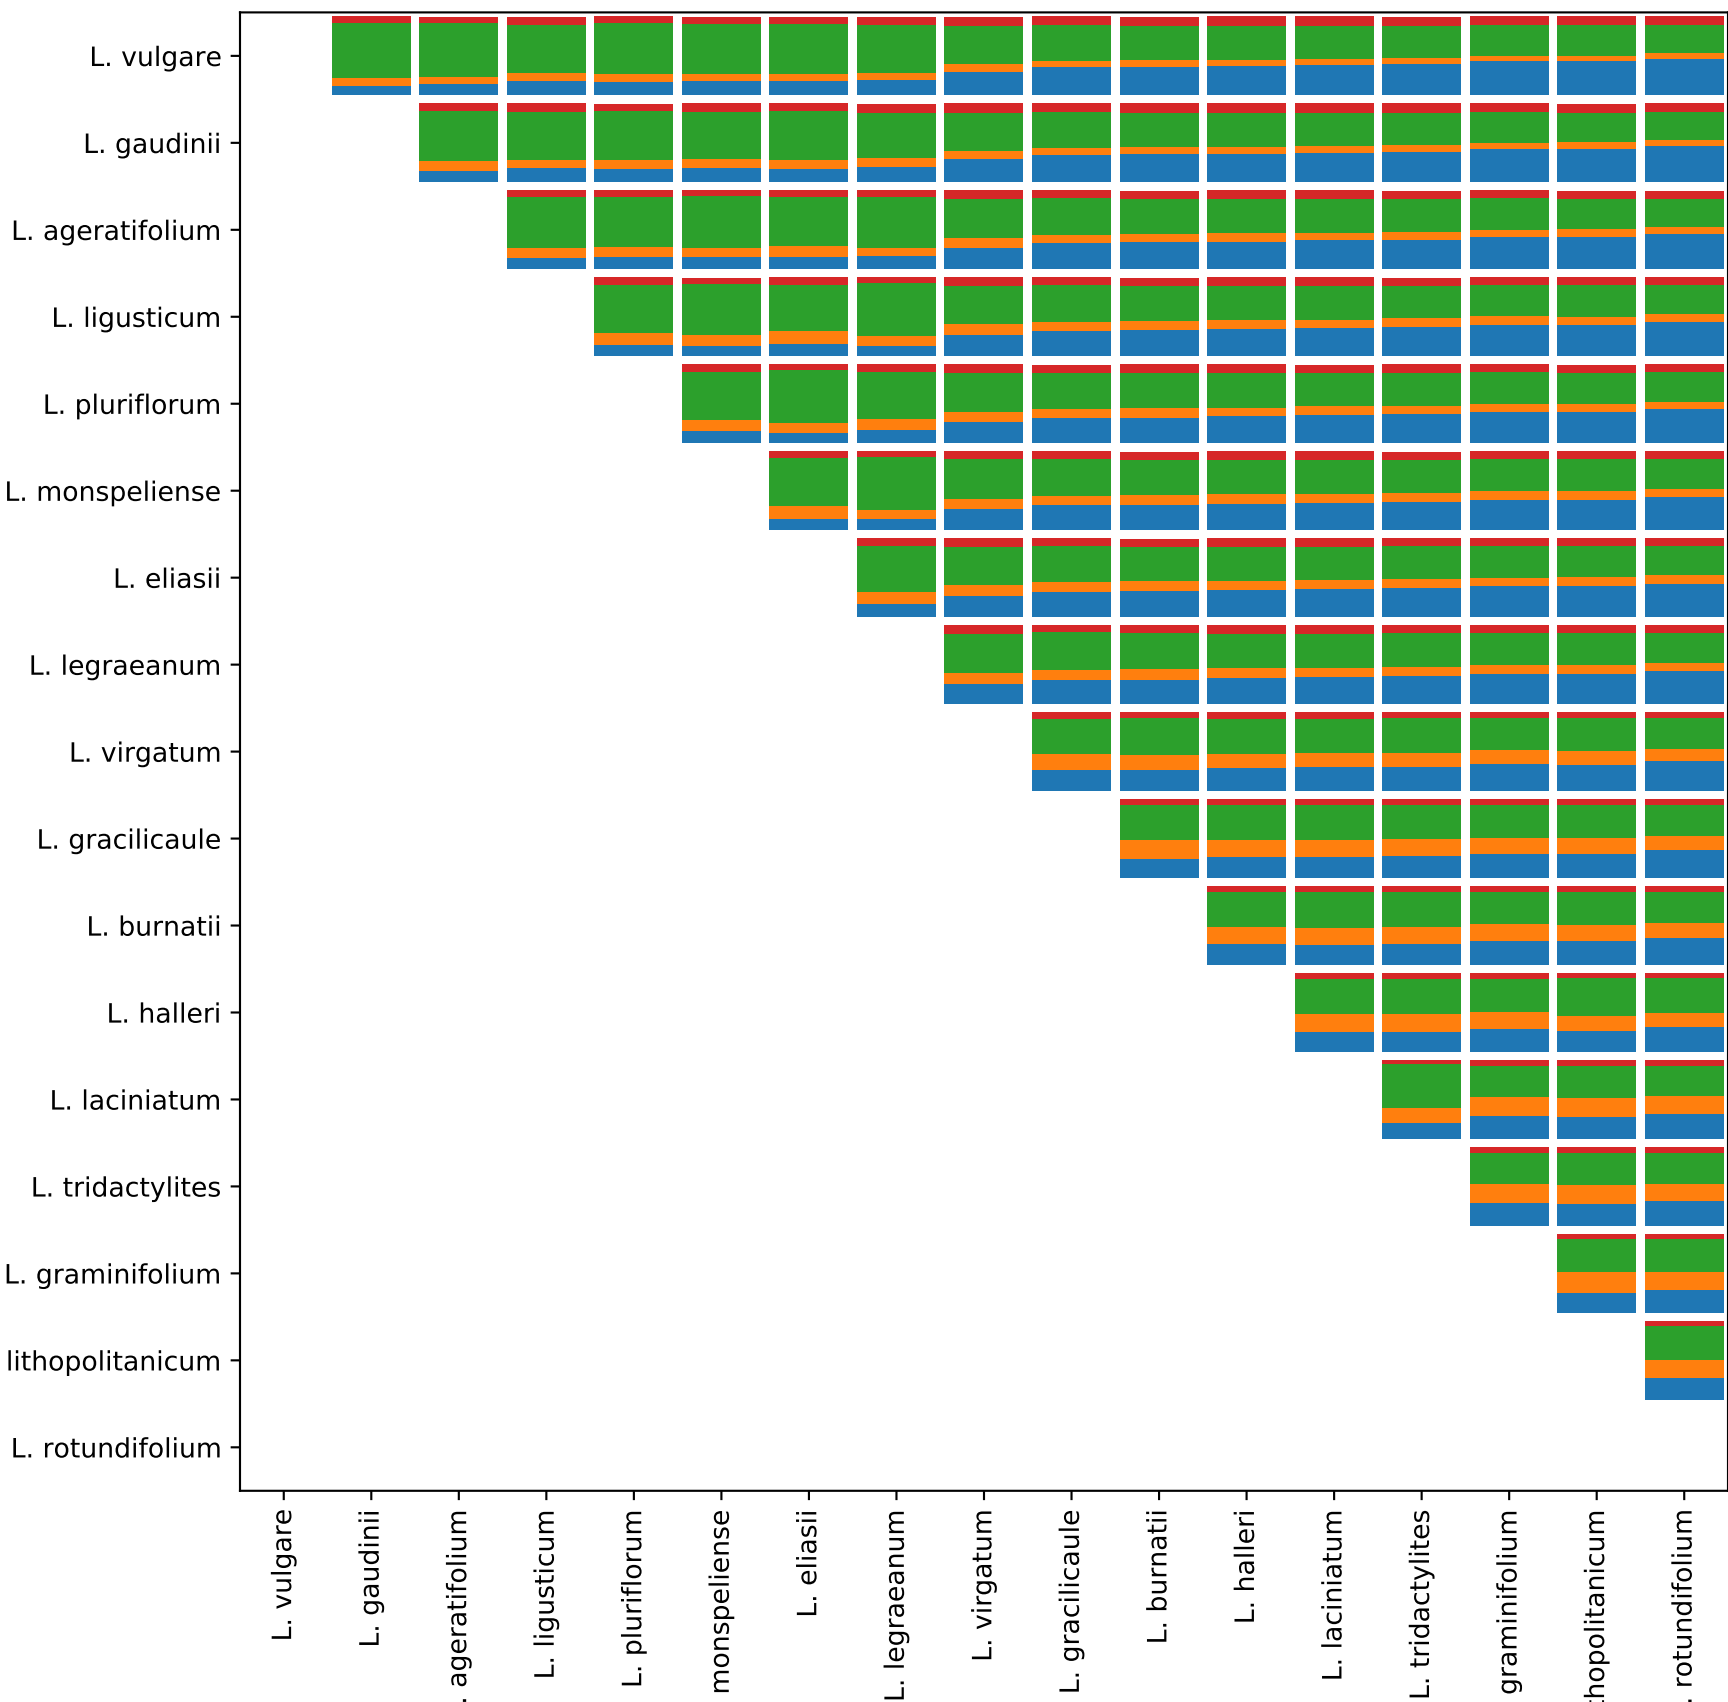

Pattern 1: blue  
Pattern 2: orange  
Pattern 3/4: green  
Pattern 5: red

L. meridionale

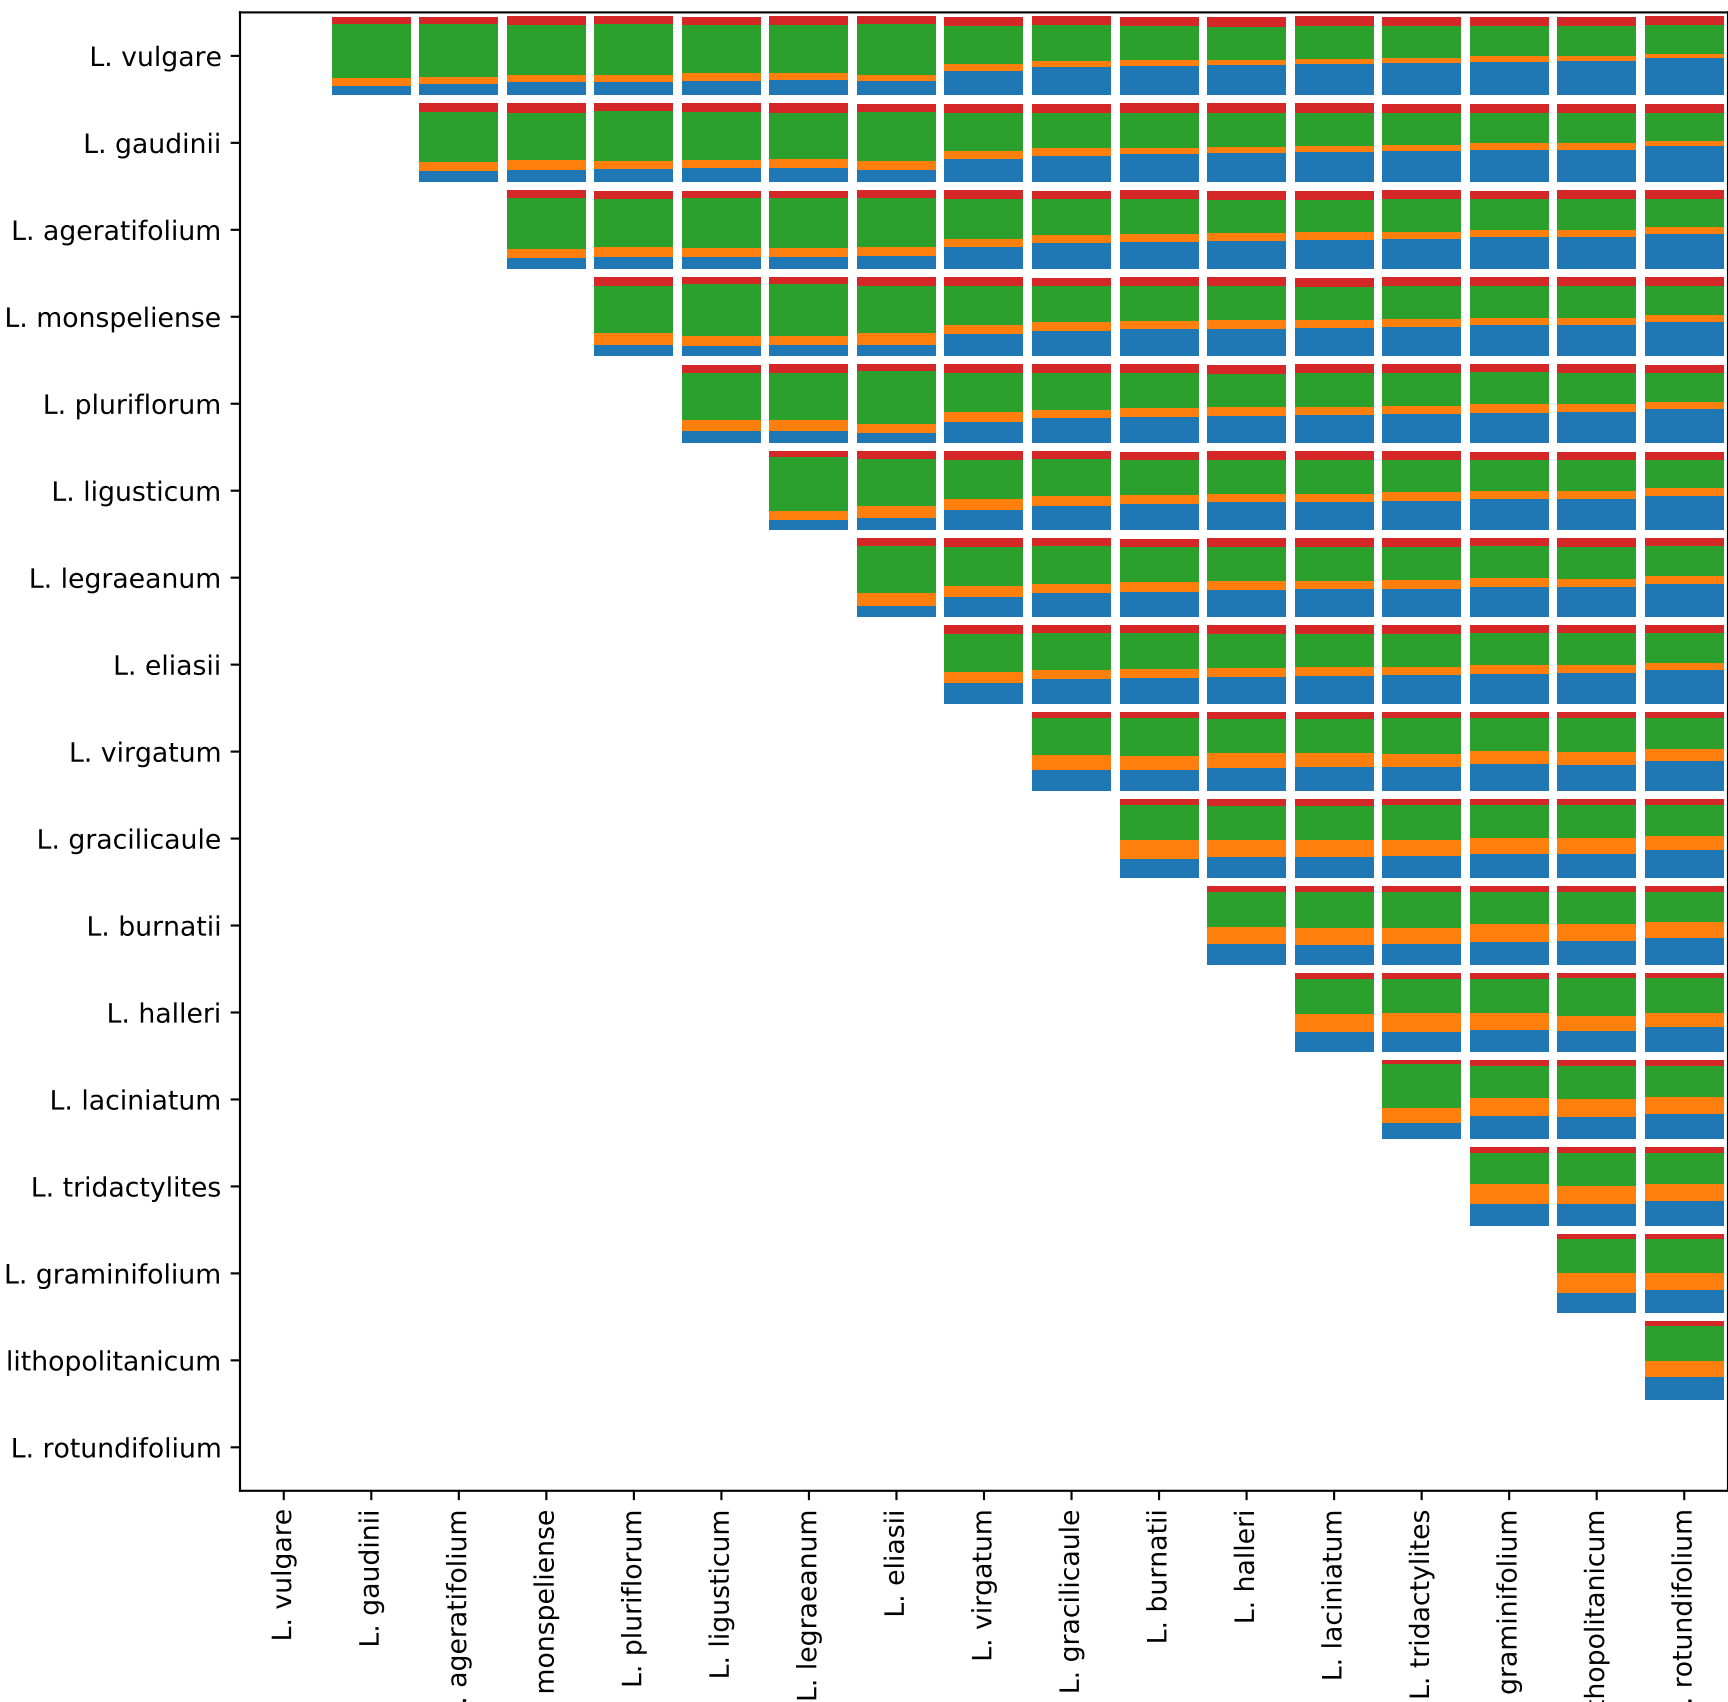

Pattern 1: blue  
Pattern 2: orange  
Pattern 3/4: green  
Pattern 5: red

*L. delarbrei* subsp. *delarbrei*

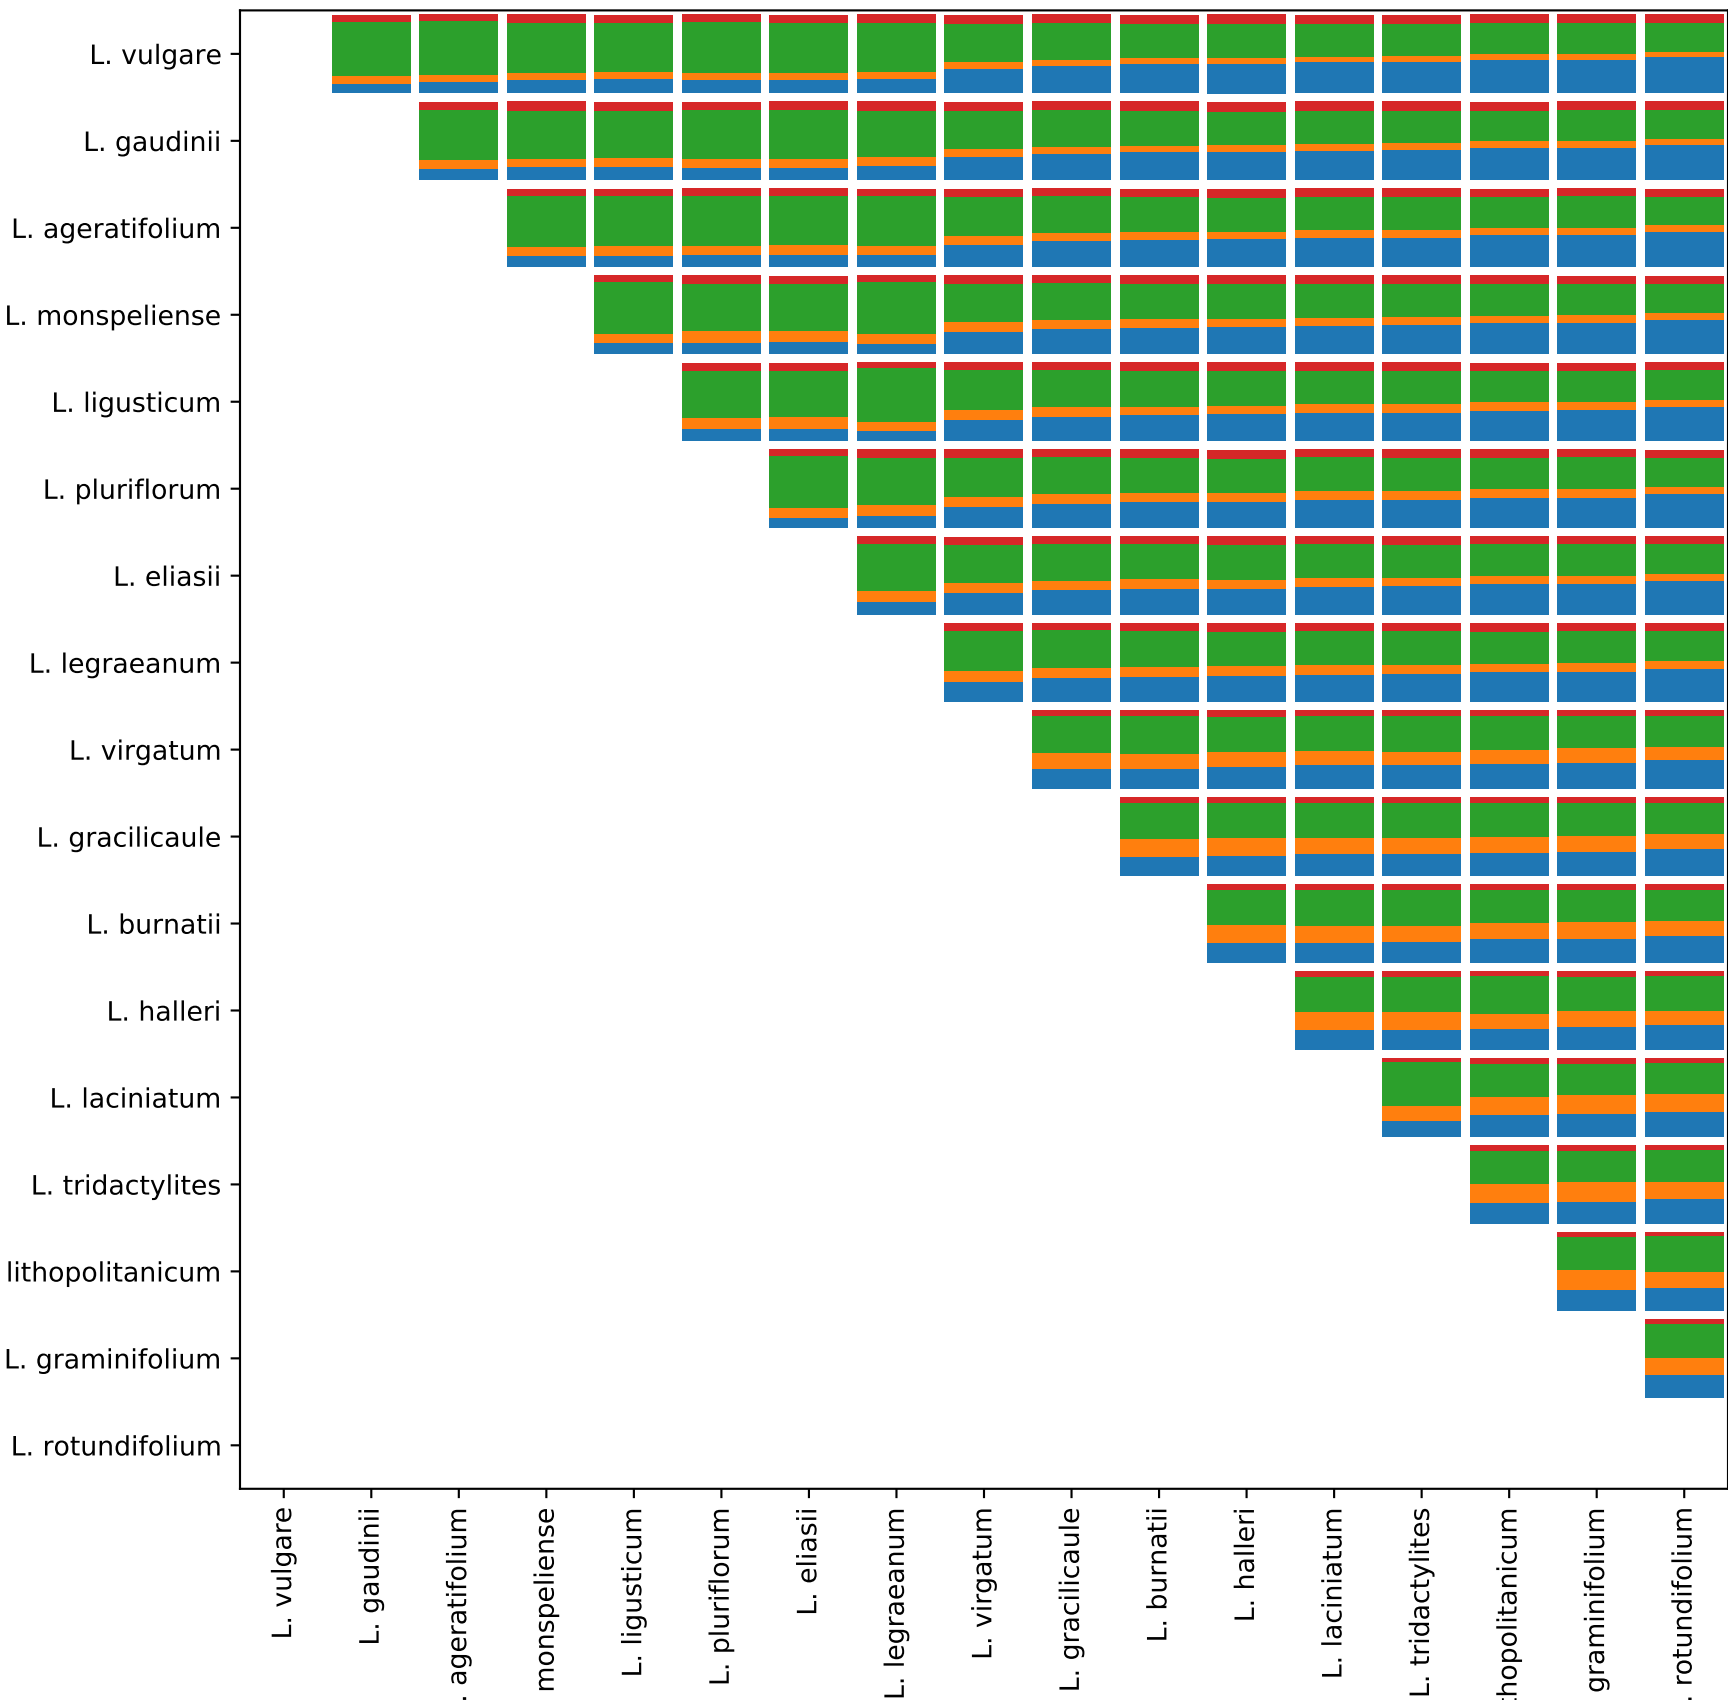

Pattern 1: blue  
Pattern 2: orange  
Pattern 3/4: green  
Pattern 5: red

# L. cantabricum

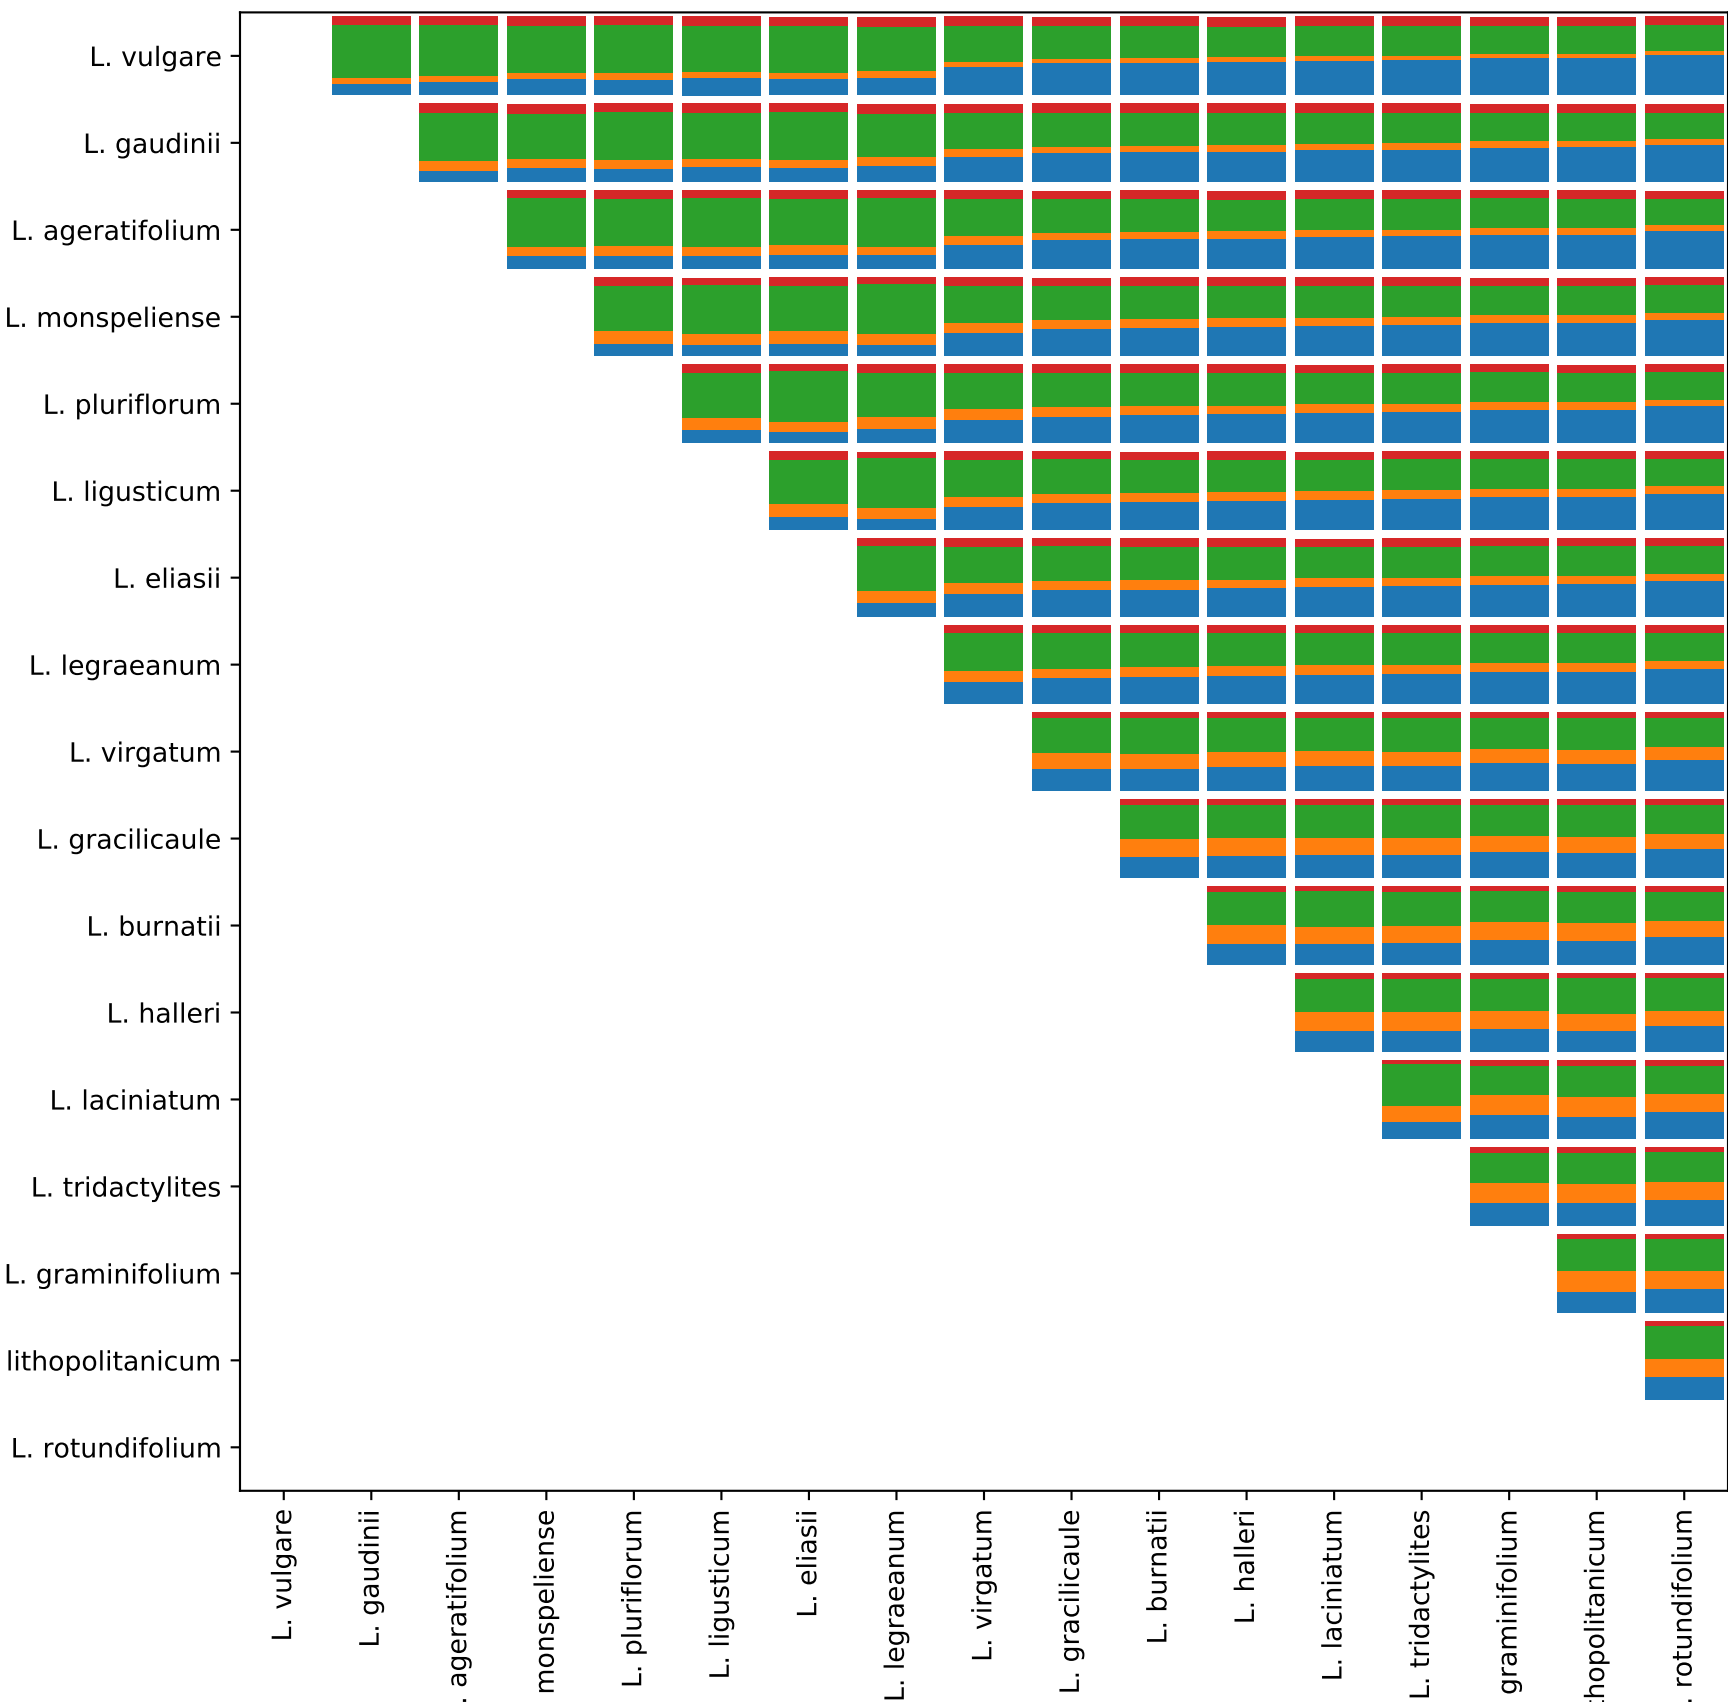

Pattern 1: blue  
Pattern 2: orange  
Pattern 3/4: green  
Pattern 5: red

L. crassifolium

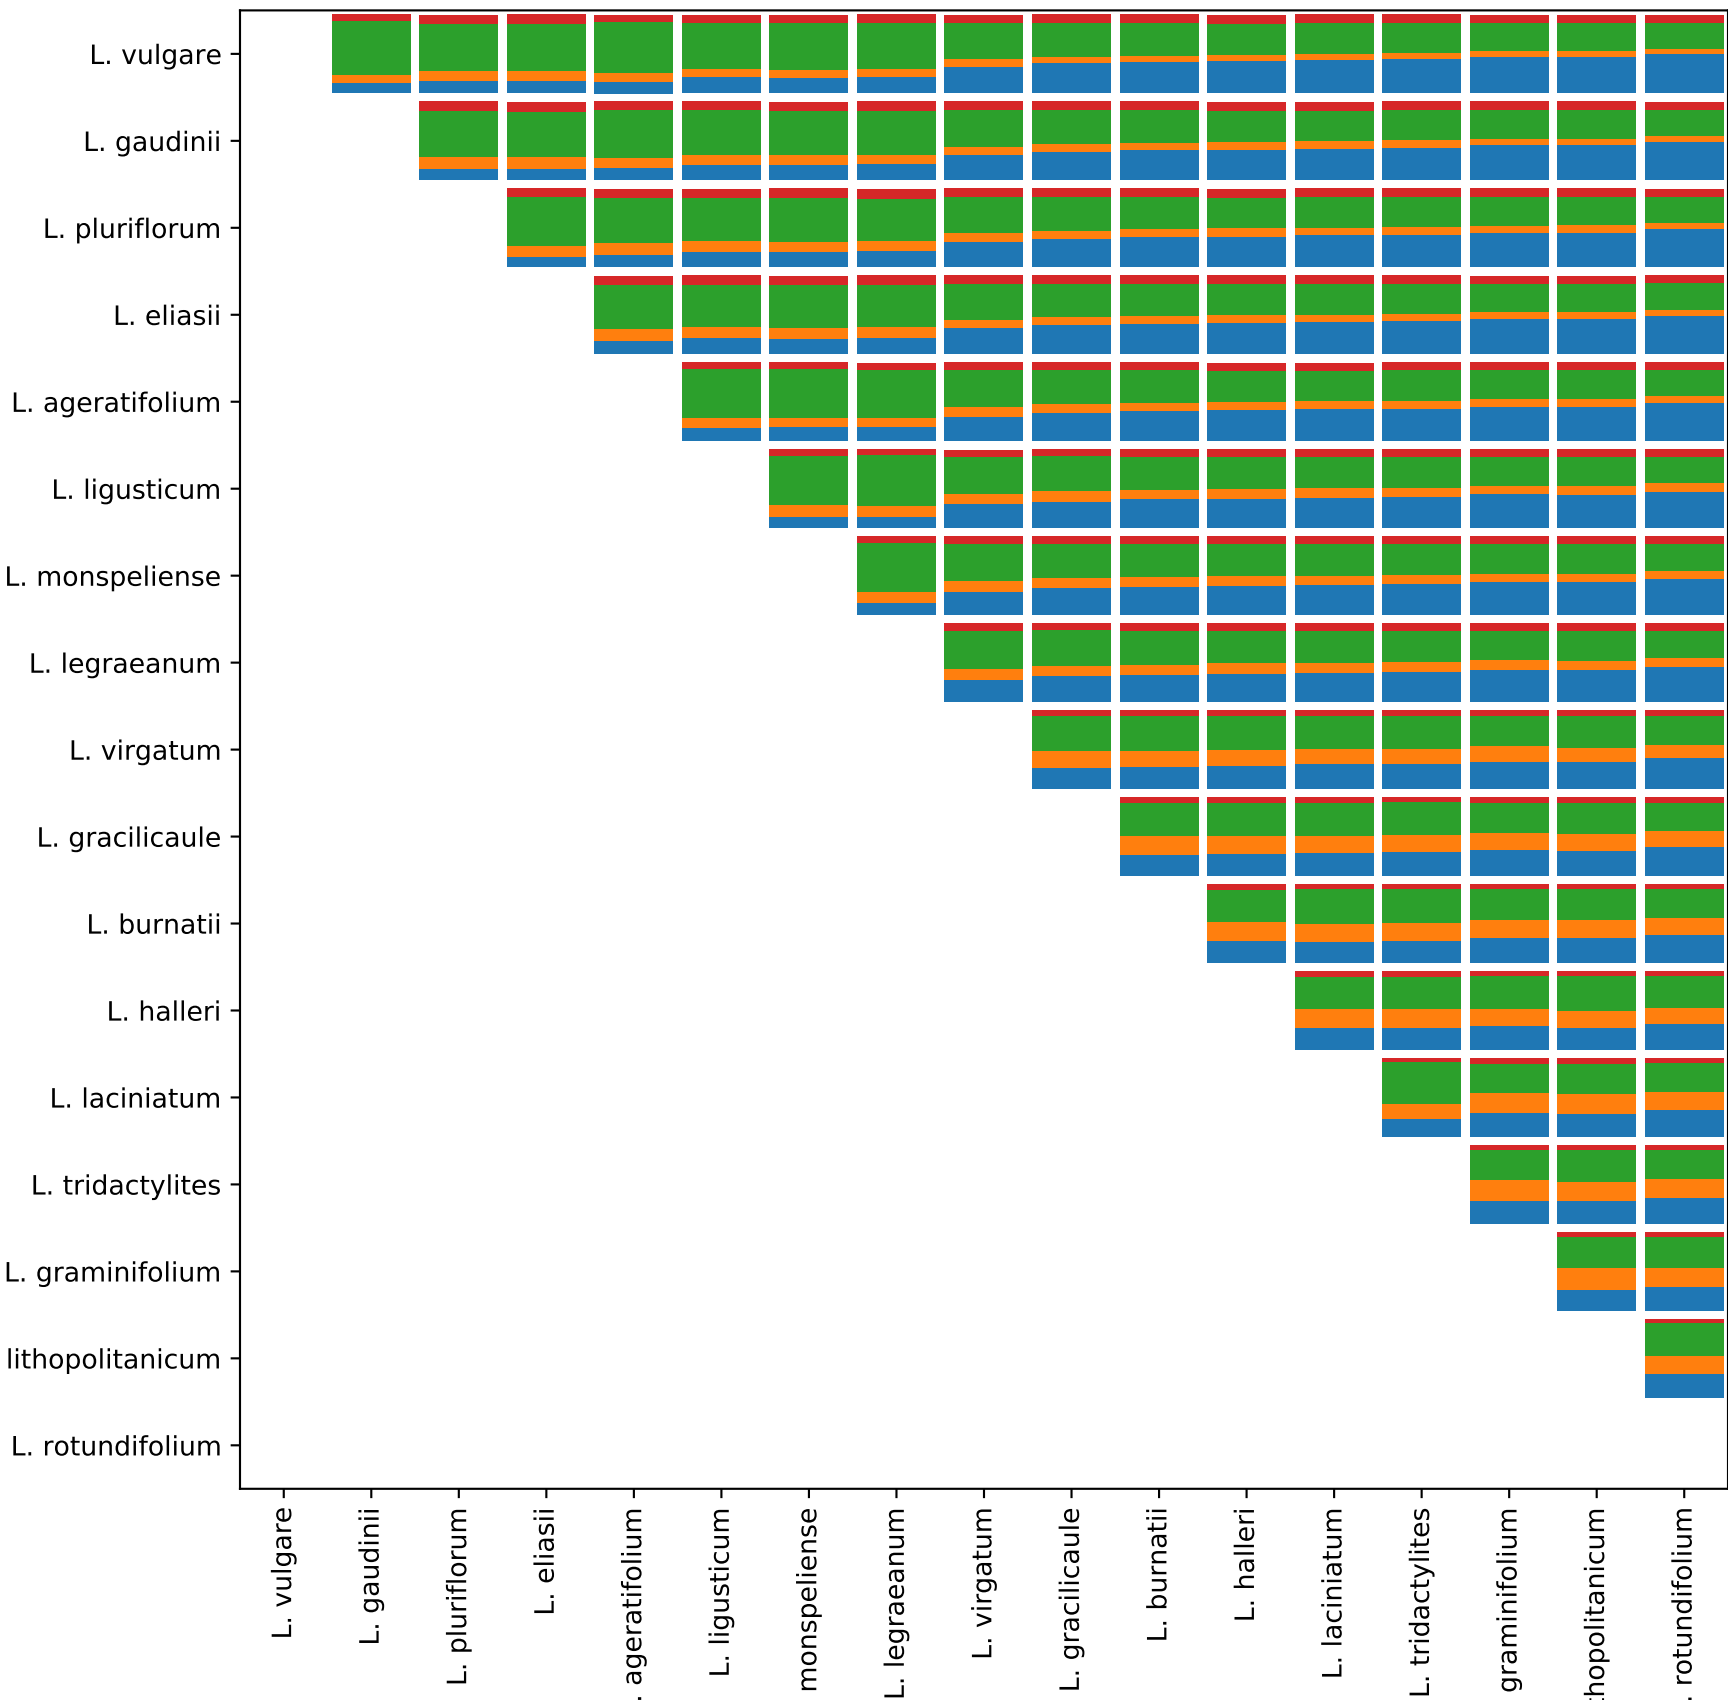

Supplement: s1 [file s1]
