# Supplementary figures and images for: Picks in the Fabric of a Polyploidy Complex: Integrative Species Delimitation in the Tetraploid Leucanthemum Mill. (Compositae, Anthemideae) Representatives
Source: MDPI journal article supplement (doi:10.3390/biology12020288), 2023-02-10

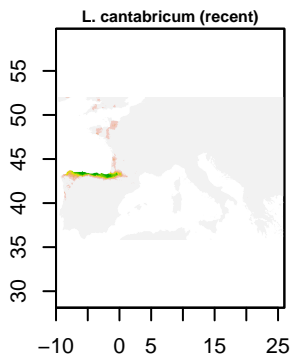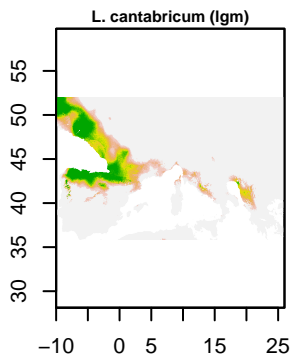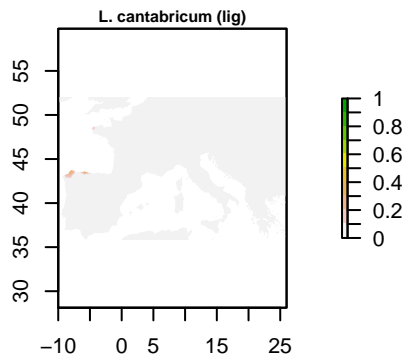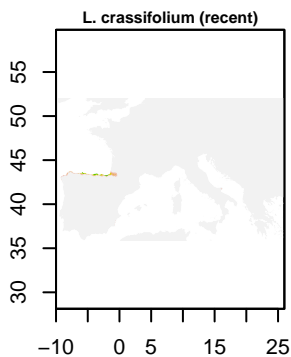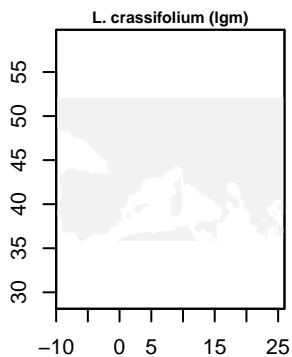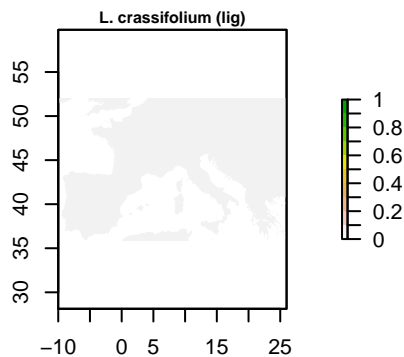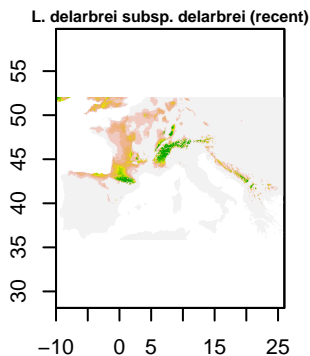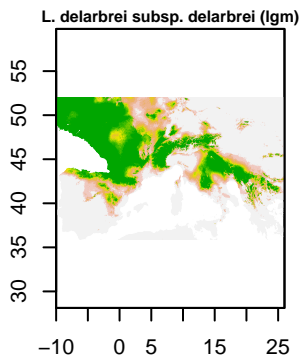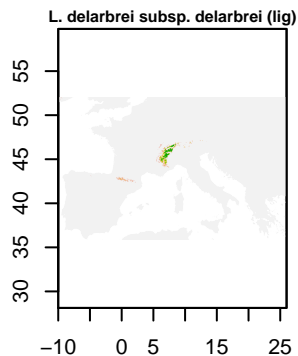



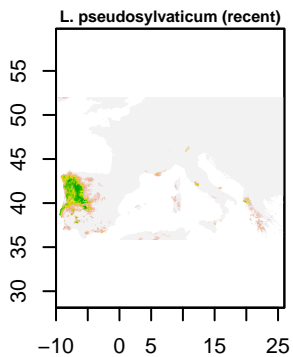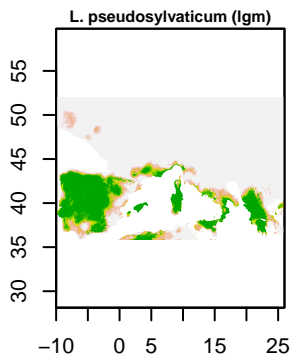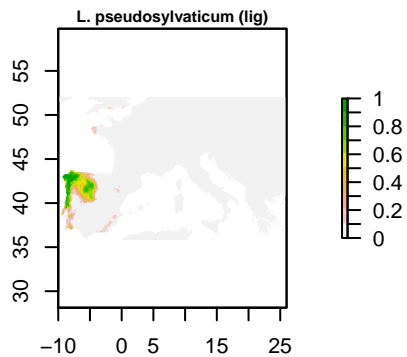

Supplement: s1 [file s1]
